# Supplementary material for: Integrative Analyses Reveal Novel Disease-associated Loci and Genes for Idiopathic Pulmonary Fibrosis
Source: bioRxiv or medRxiv preprint supplement (doi:10.1101/2021.05.11.21257064), 2021-05-14
Supplement: Supplementary file [file media-1.pdf]

# Contents

|                                                                                                                                                                                                                                                                                                                                                                                                                                                                                                                        |        |
|------------------------------------------------------------------------------------------------------------------------------------------------------------------------------------------------------------------------------------------------------------------------------------------------------------------------------------------------------------------------------------------------------------------------------------------------------------------------------------------------------------------------|--------|
| <b>Supplementary Figures</b> .....                                                                                                                                                                                                                                                                                                                                                                                                                                                                                     | 3 - 12 |
| Region mirror Manhattan plots for 14 local regions across 14 phenotypes with significant local genetic correlations with IPF tested using SUPERGNOVA (FDR < 0.05). P values from IPF GWAS summary statistics are plotted on the top and P values for the SNPs located within the significant SUPERGNOVA region is highlighted in blue. P values from another trait's summary statistics are plotted on the bottom and P values for the SNPs located within the significant SUPERGNOVA region is highlighted in yellow. |        |

## Supplementary Tables

|                                                                               |         |
|-------------------------------------------------------------------------------|---------|
| S Table 1: Phenotype-level correlations .....                                 | 13      |
| S Table 2: Polygenic risk score correlations .....                            | 13      |
| S Table 3: Global genetic correlations .....                                  | 14      |
| S Table 4: Significant local regions from SUPERGNOVA .....                    | 15      |
| S Table 5: TWAS UTMOST results .....                                          | 16      |
| S Table 6: Differential gene expression analysis .....                        | 17      |
| S Table 7: Partitioned heritability results .....                             | 18      |
| S Table 8: <i>MAFK</i> and <i>SMAD2</i> target gene set from CHIP-Atlas ..... | 19      |
| S Table 9A: Enrichment analysis of <i>MAFK</i> targets .....                  | 20 - 24 |
| S Table 9B: Enrichment analysis of <i>SMAD2</i> targets .....                 | 25 - 28 |
| S Table 10: GWAS study information .....                                      | 29      |

**IPF vs BFP at chromosome 2:100197638-101338509**

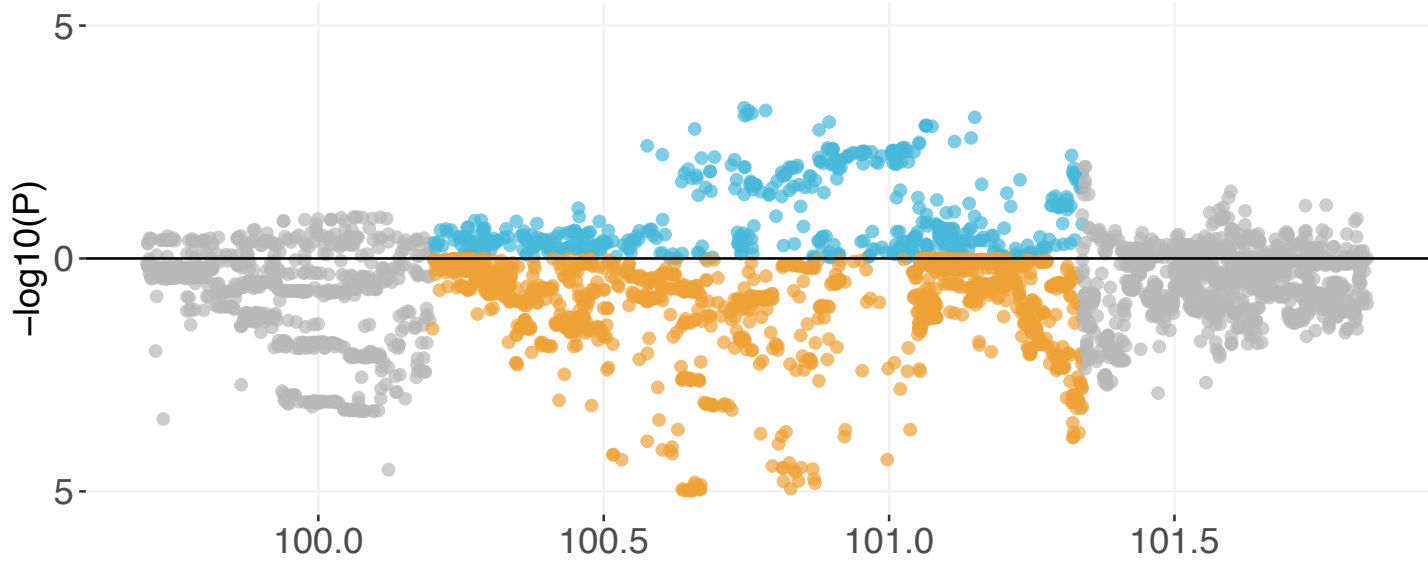

**IPF vs HC at chromosome 4:48227642-53412129**

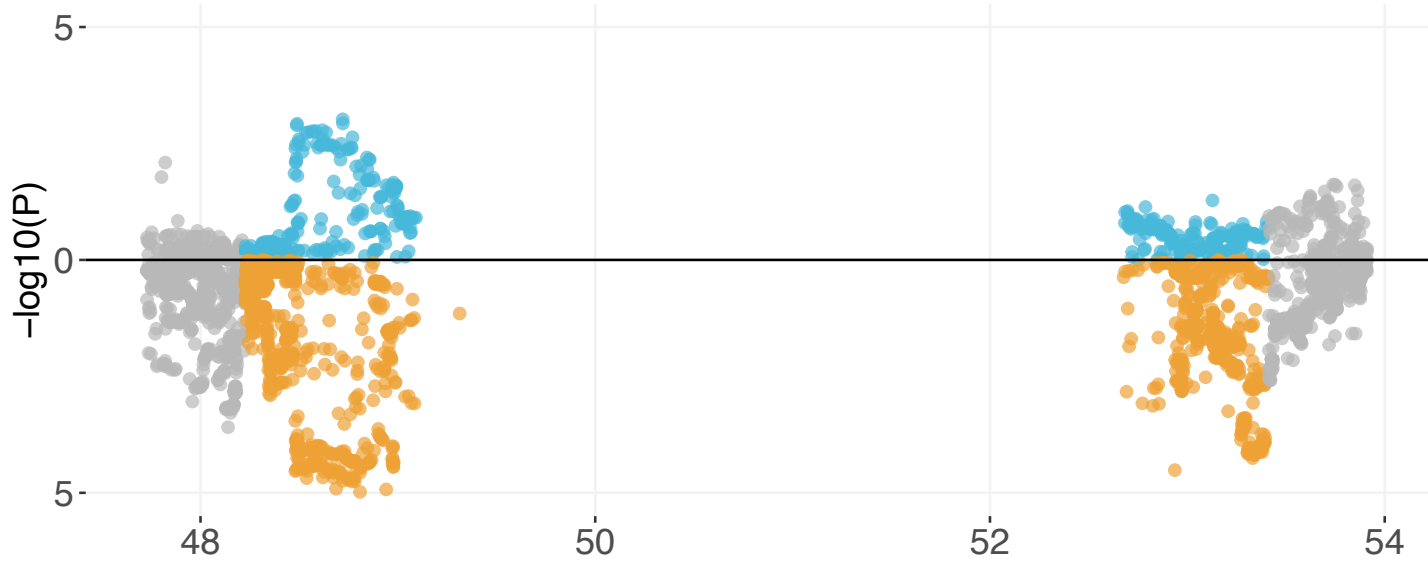

**IPF vs WBF at chromosome 4:48227642-53412129**

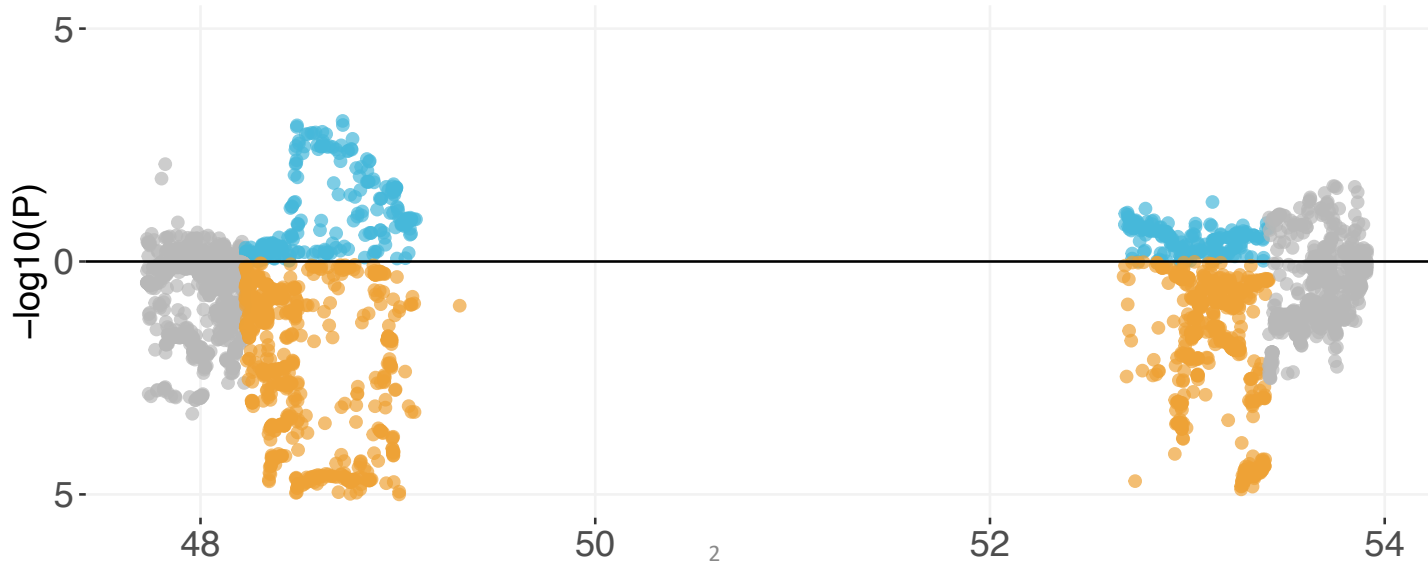

**IPF vs BD at chromosome 4:145024452-148047972**

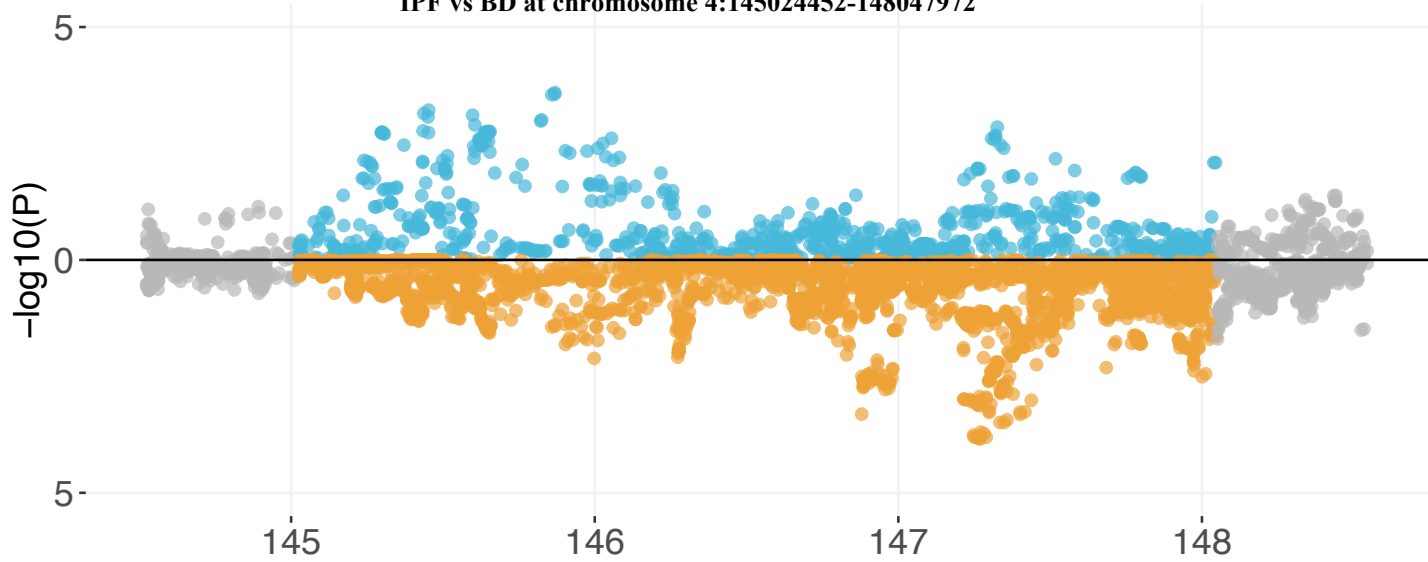

**IPF vs HC at chromosome 4:145024452-148047972**

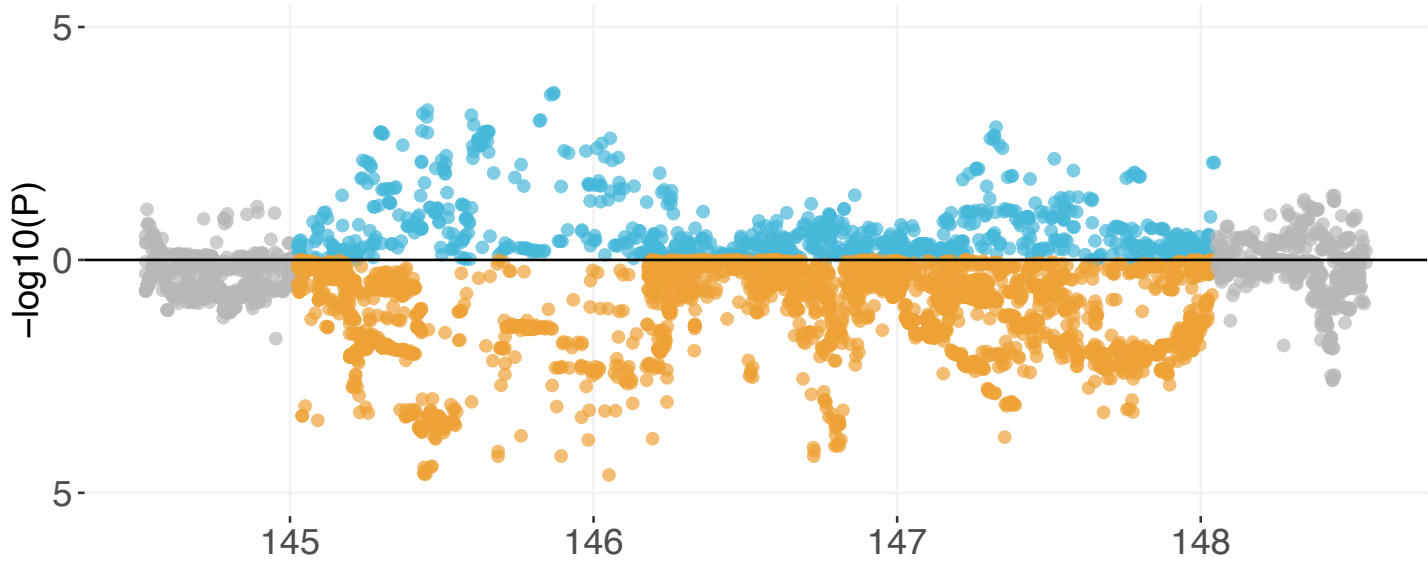

**IPF vs LC-Adeno at chromosome 7:71874997-73996533**

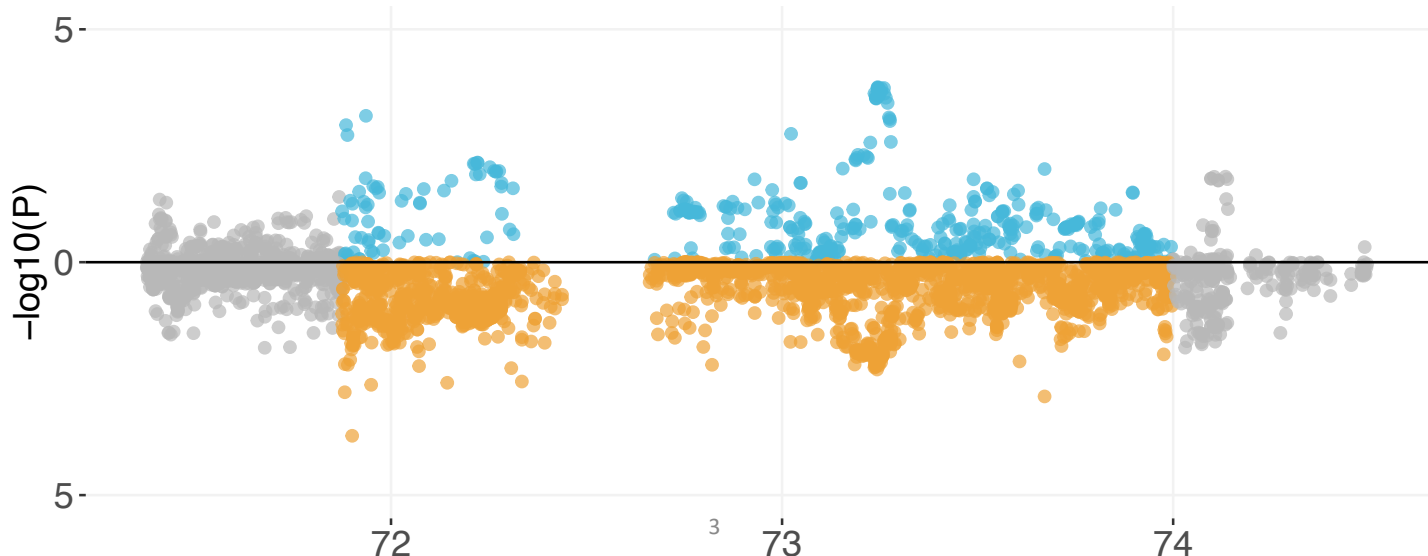

IPF vs LC-Overall at chromosome 7:71874997-73996533

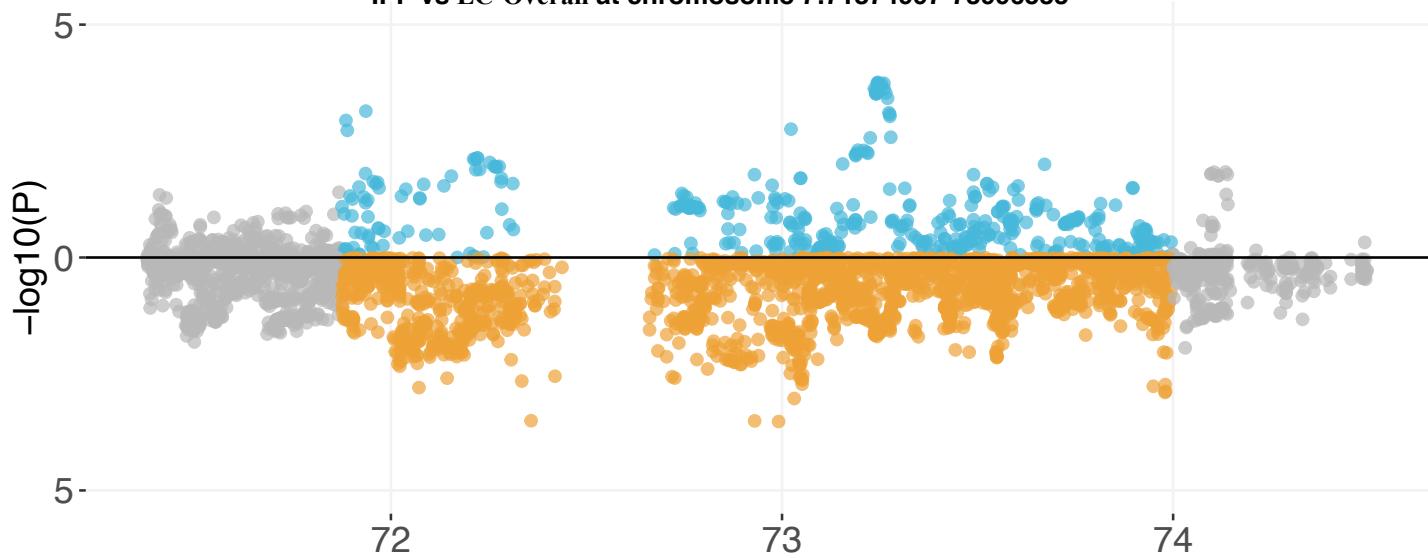

IPF vs GERD at chromosome 7:124155319-125386718

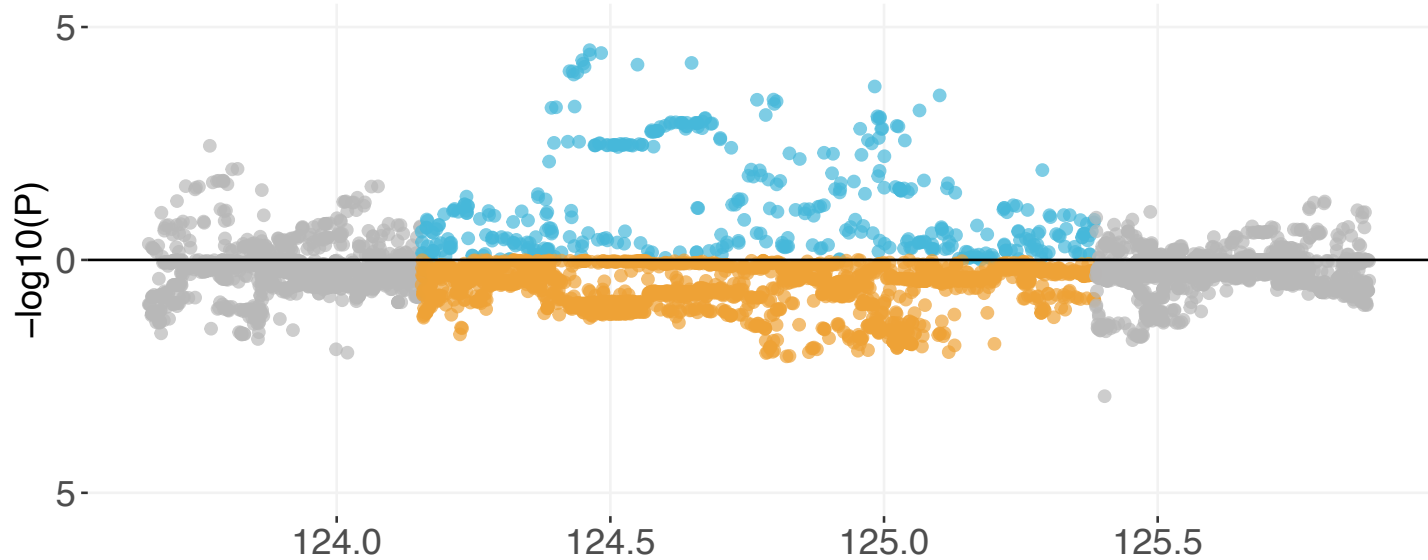

IPF vs LC-Adeno at chromosome 7:124155319-125386718

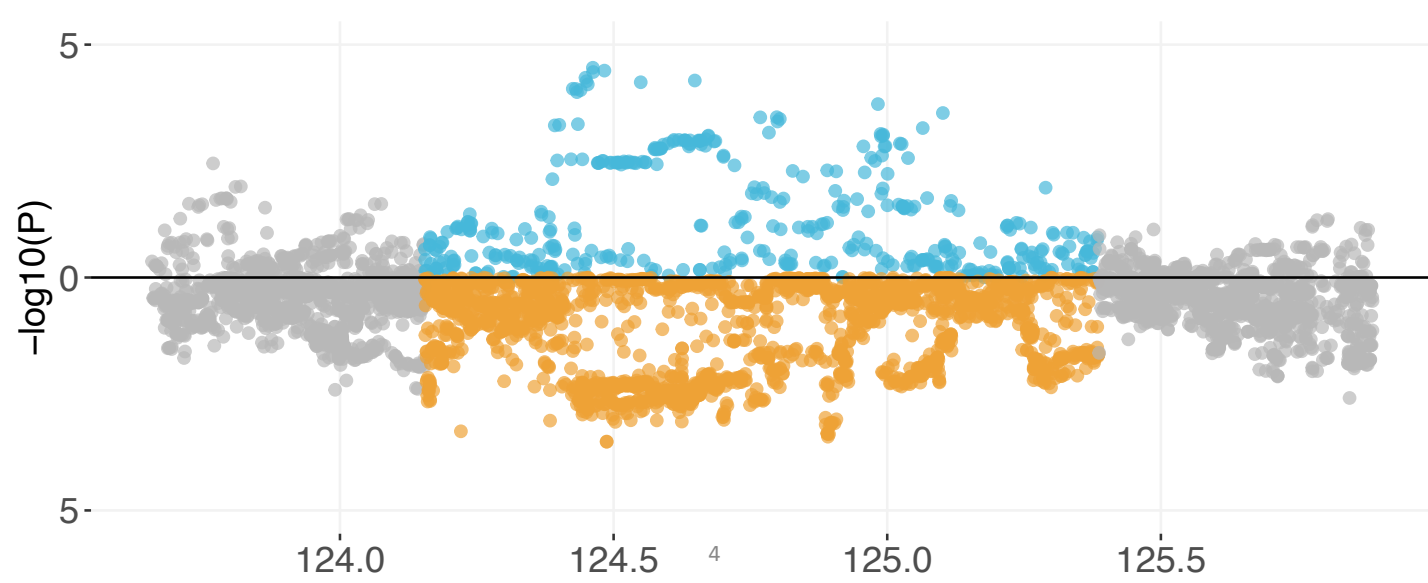



**IPF vs LC-Ever at chromosome 7:124155319-125386718**

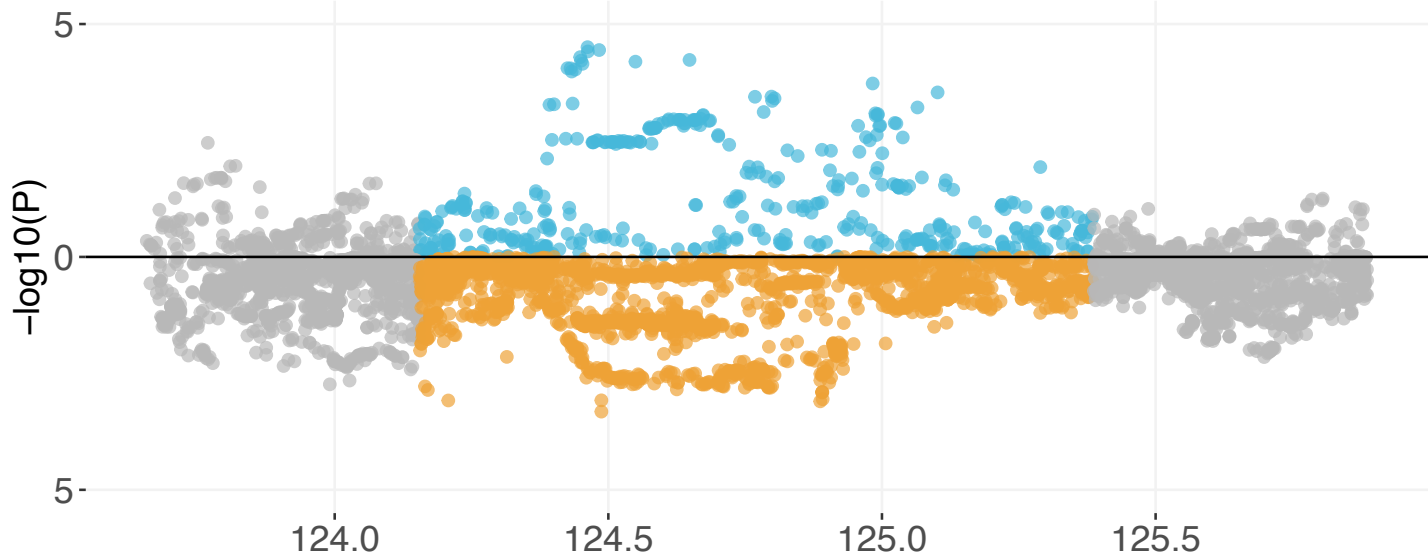

**IPF vs PC at chromosome 7:124155319-125386718**

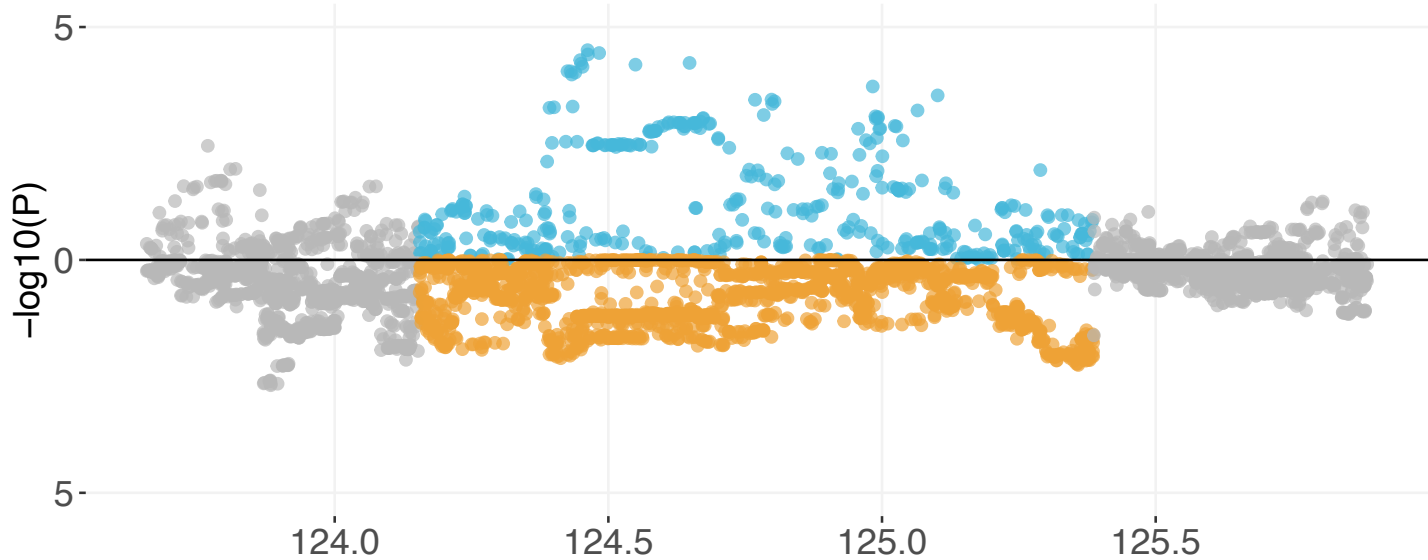

**IPF vs SKIN at chromosome 7:124155319-125386718**

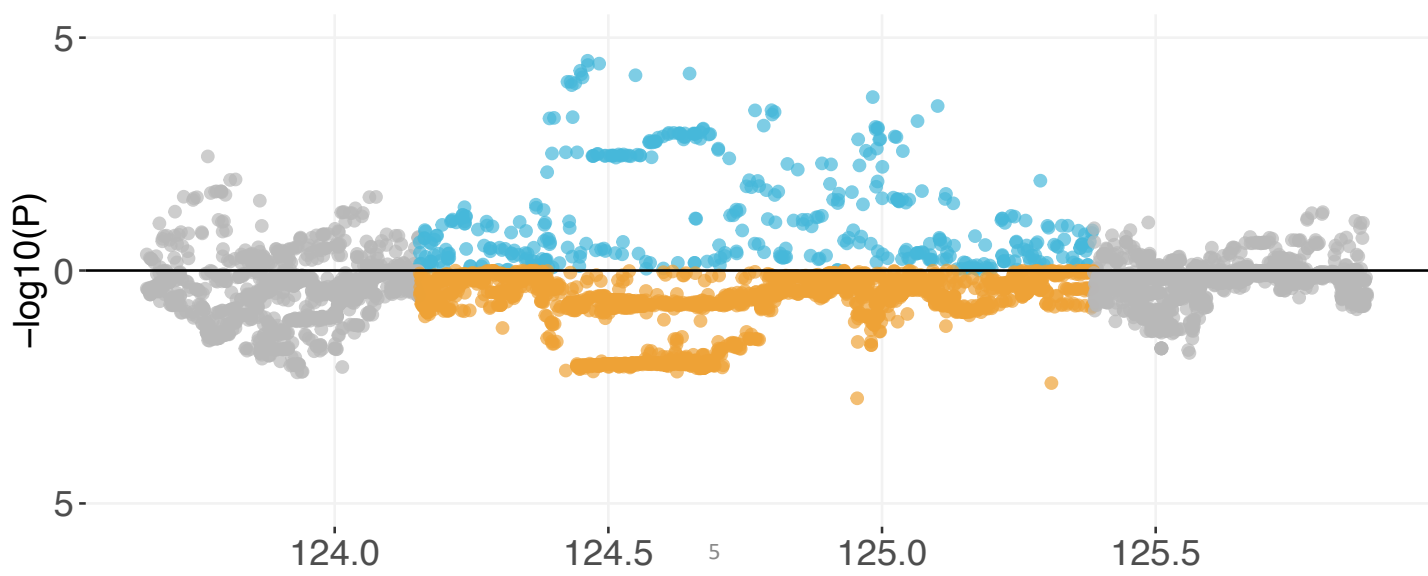

**IPF vs FIBRO at chromosome 8:108646968-110761074**

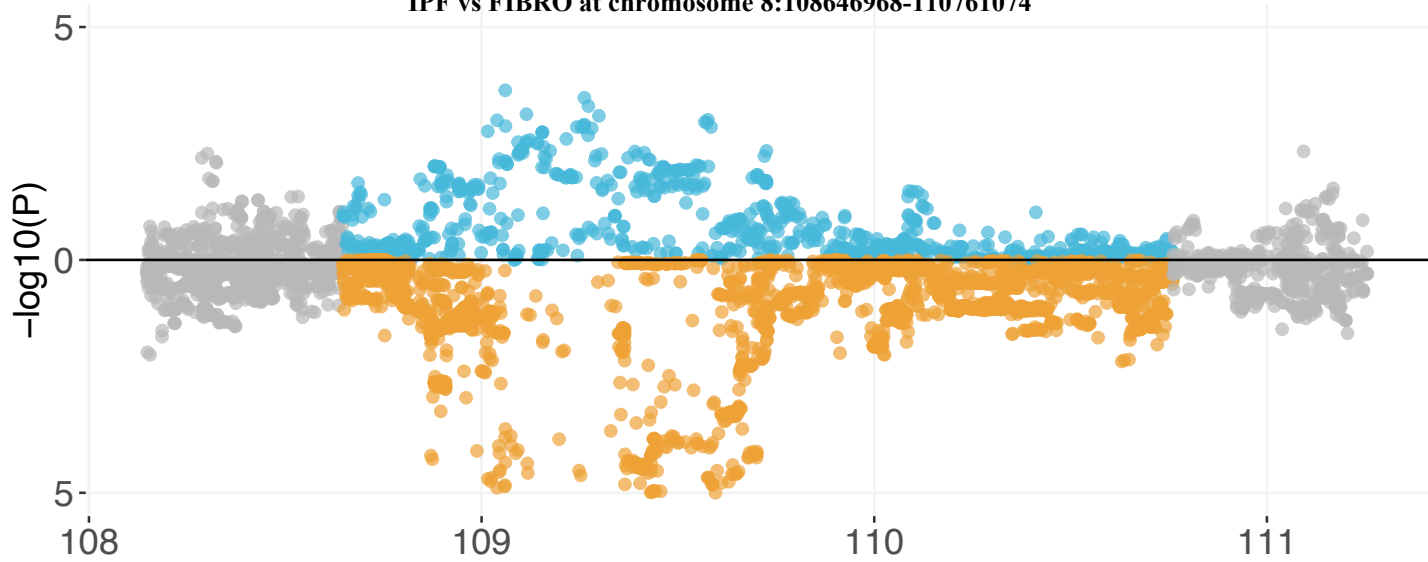

**IPF vs PFF at chromosome 8:108646968-110761074**

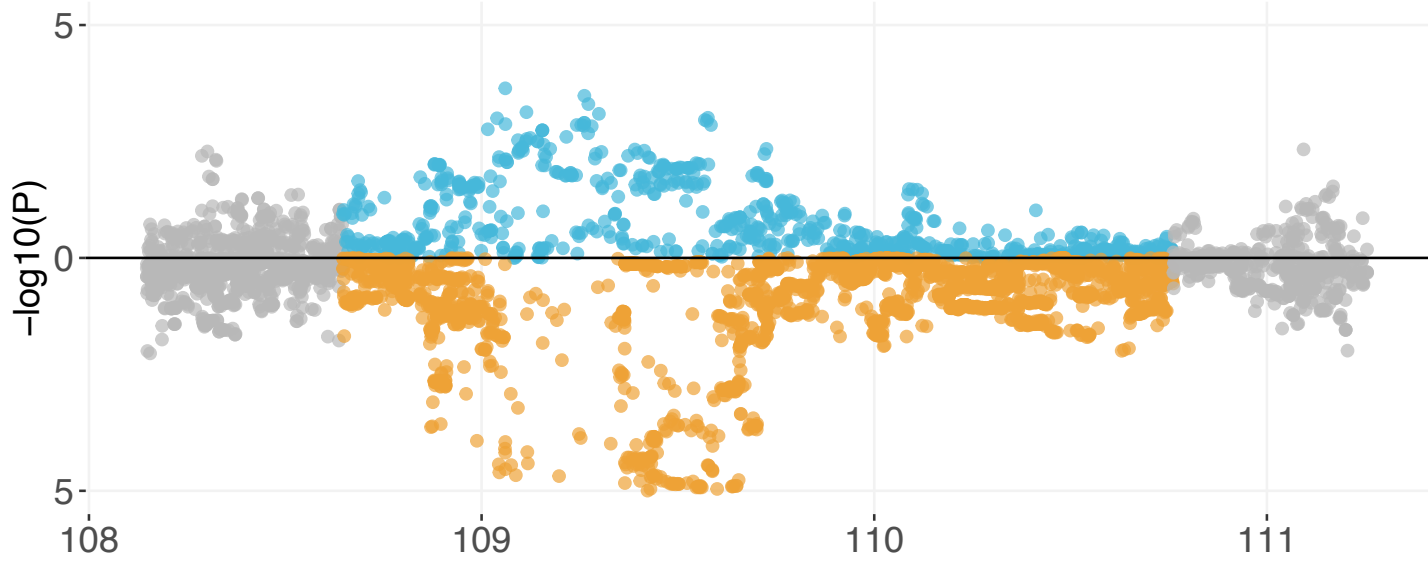

**IPF vs BFP at chromosome 10:118417453-119697663**

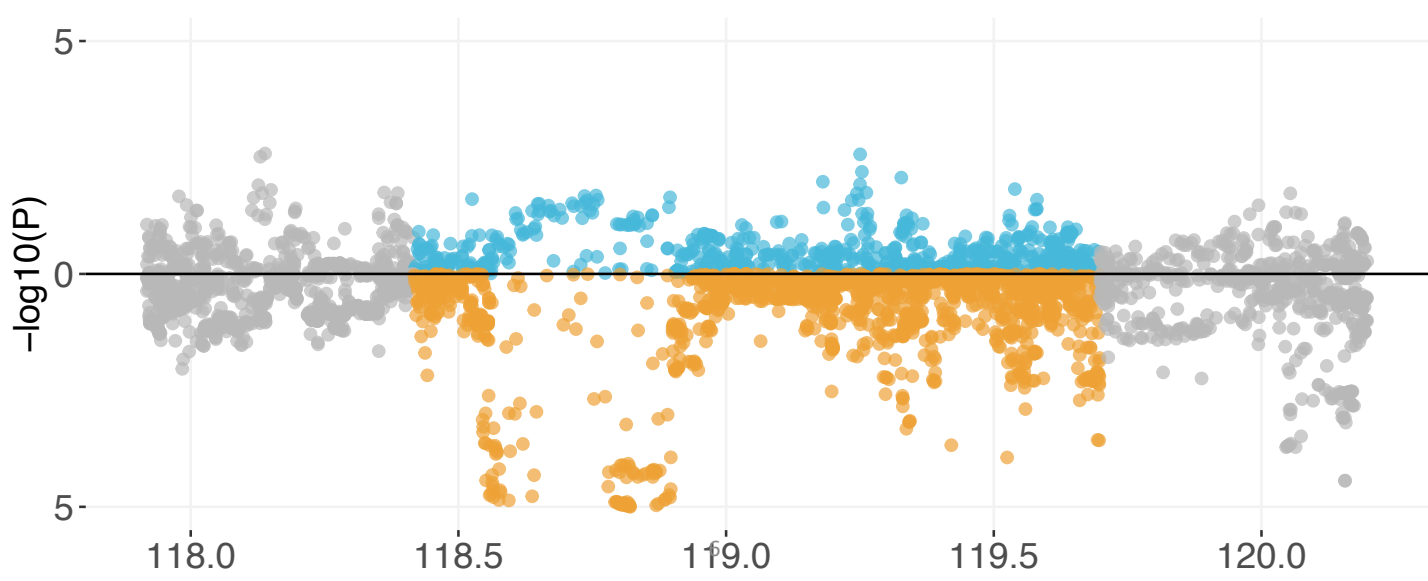

**IPF vs BMI at chromosome 10:118417453-119697663**

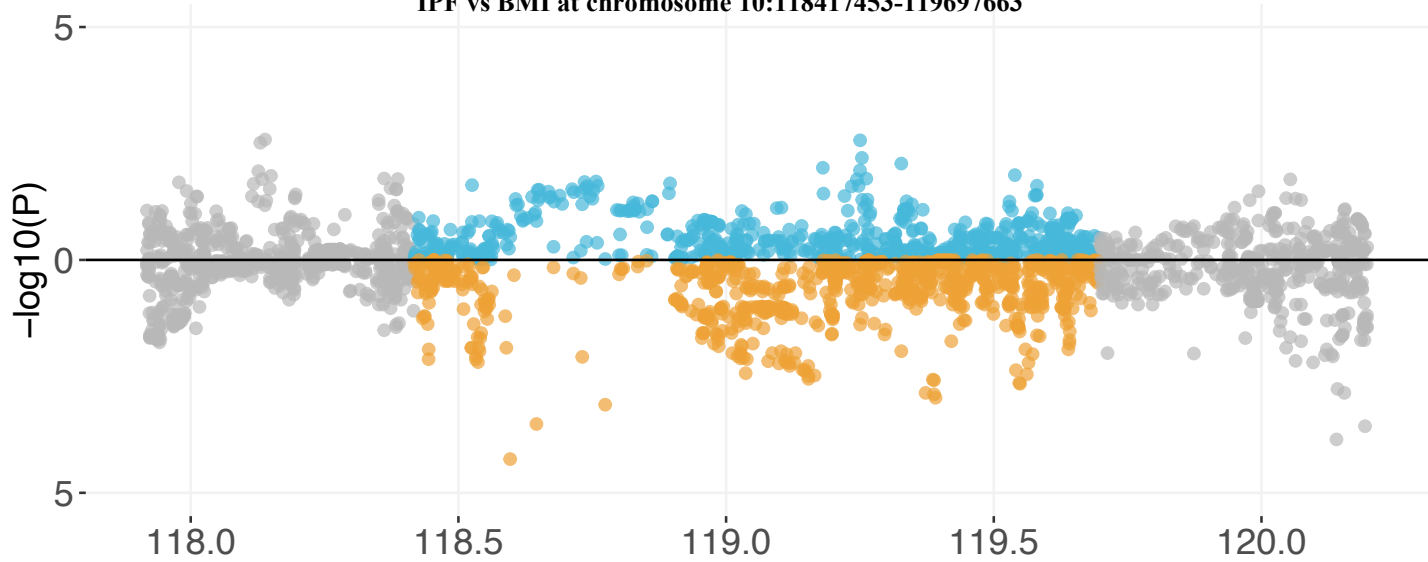

**IPF vs WBF at chromosome 10:118417453-119697663**

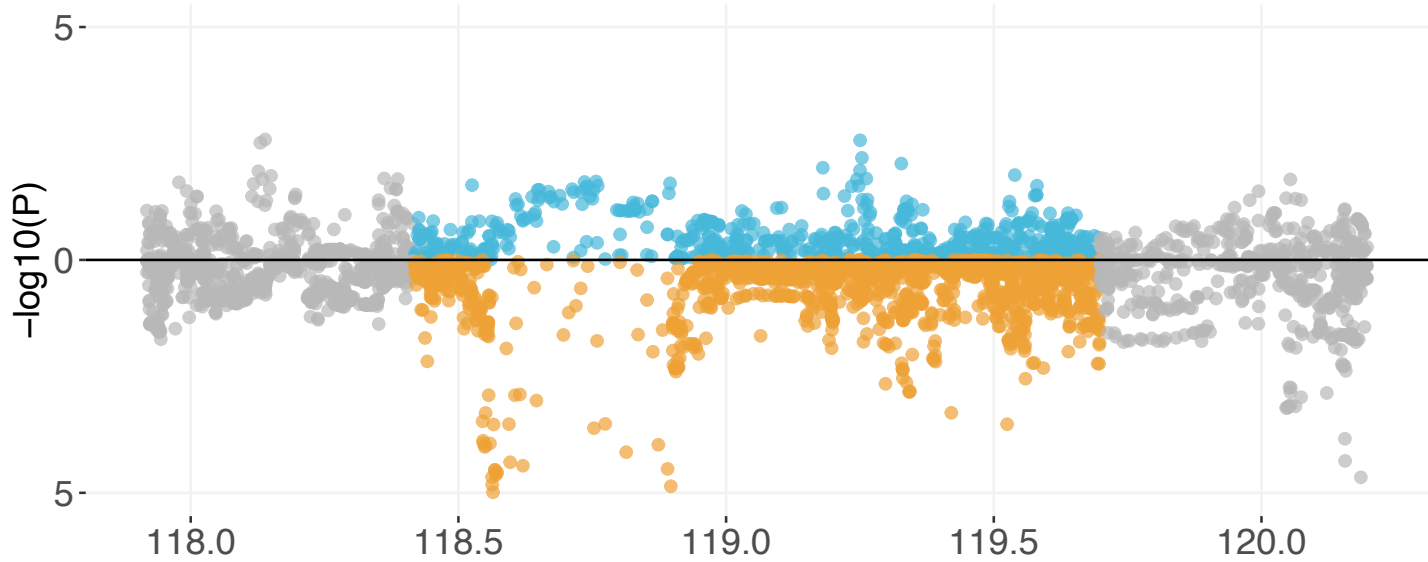

**IPF vs BMI at chromosome 12:97439589-99220284**

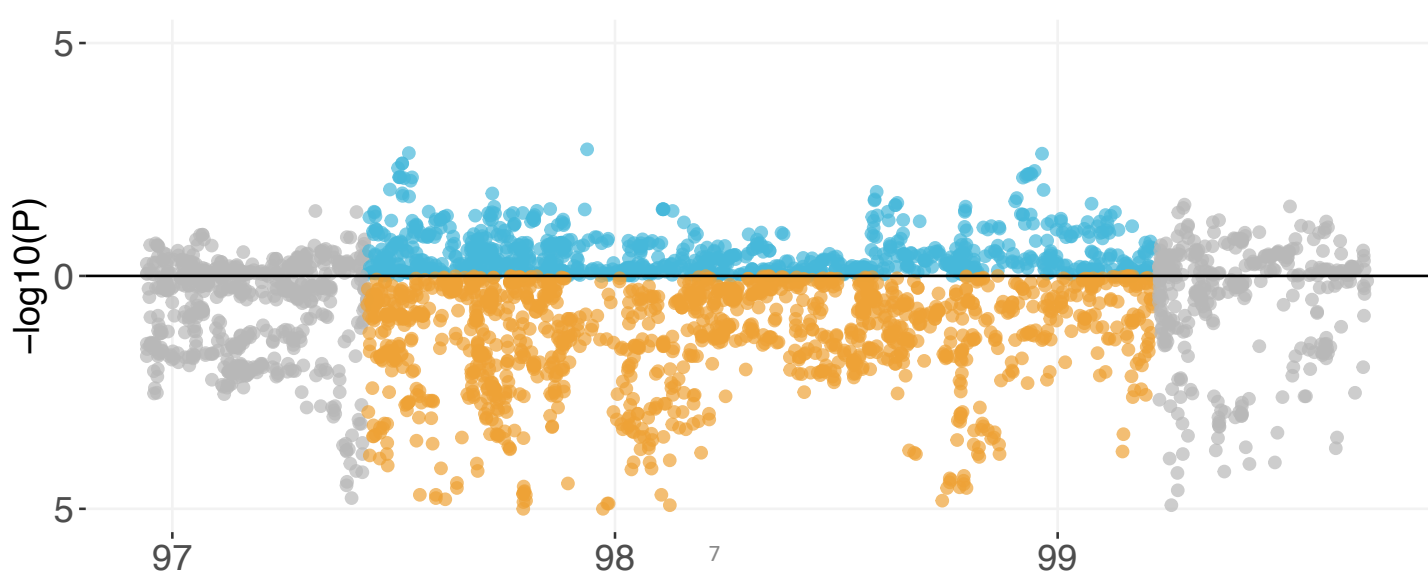

IPF vs HC at chromosome 12:97439589-99220284

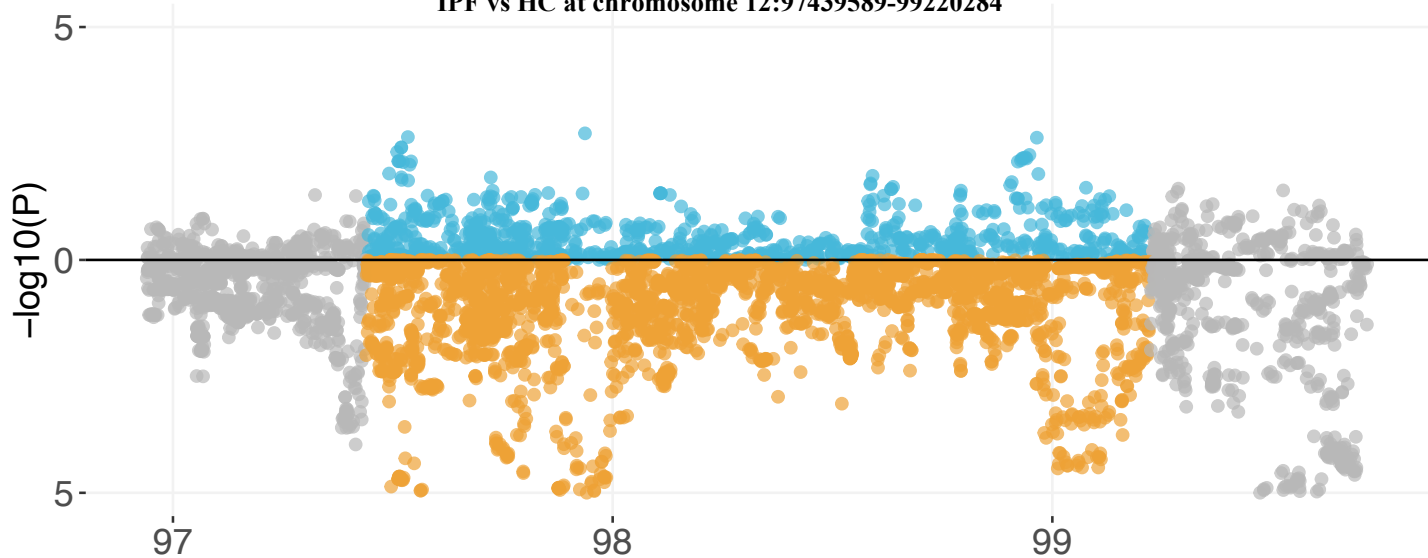

IPF vs HC at chromosome 13:40181792-41773356

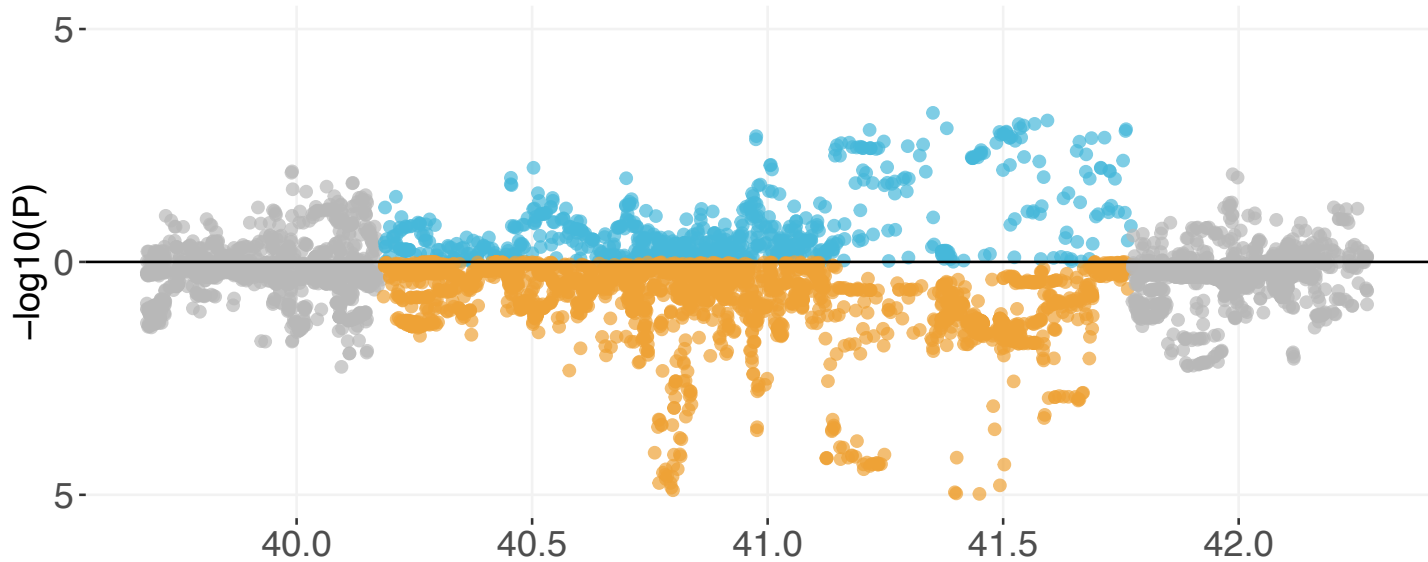

IPF vs BMI at chromosome 14:93379151-94420996

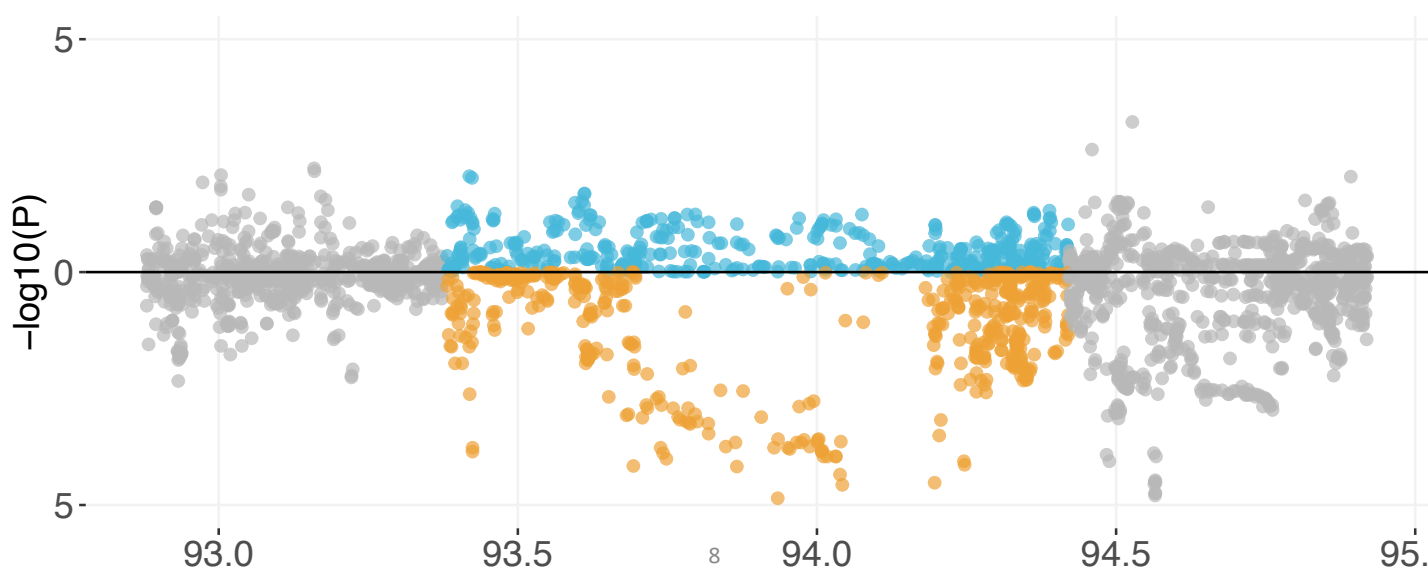

**IPF vs PC at chromosome 18:45314528-46208355**

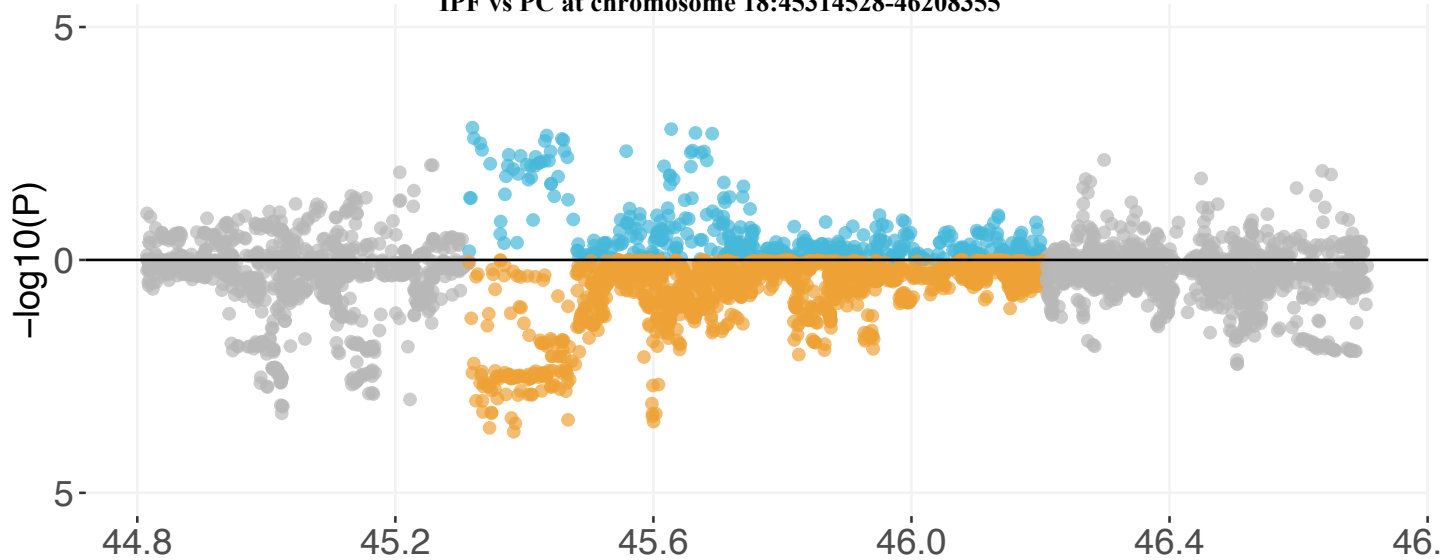

**IPF vs BD at chromosome 19:10030690-11279257**

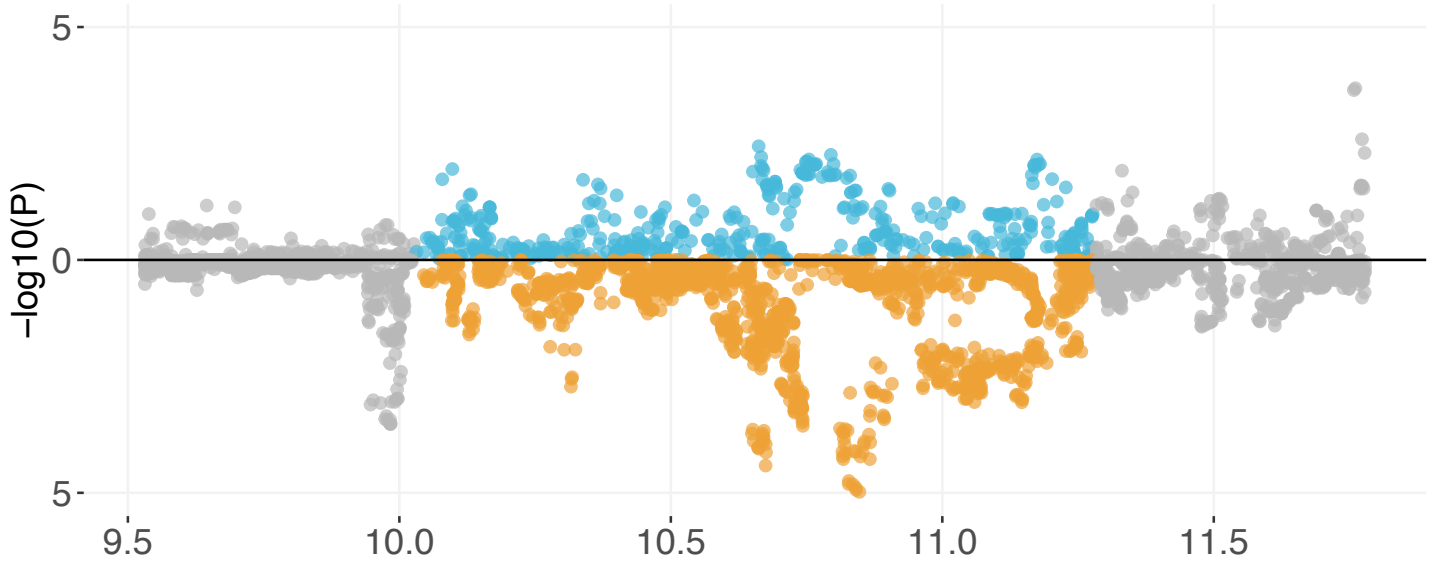

**IPF vs HC at chromosome 19:10030690-11279257**

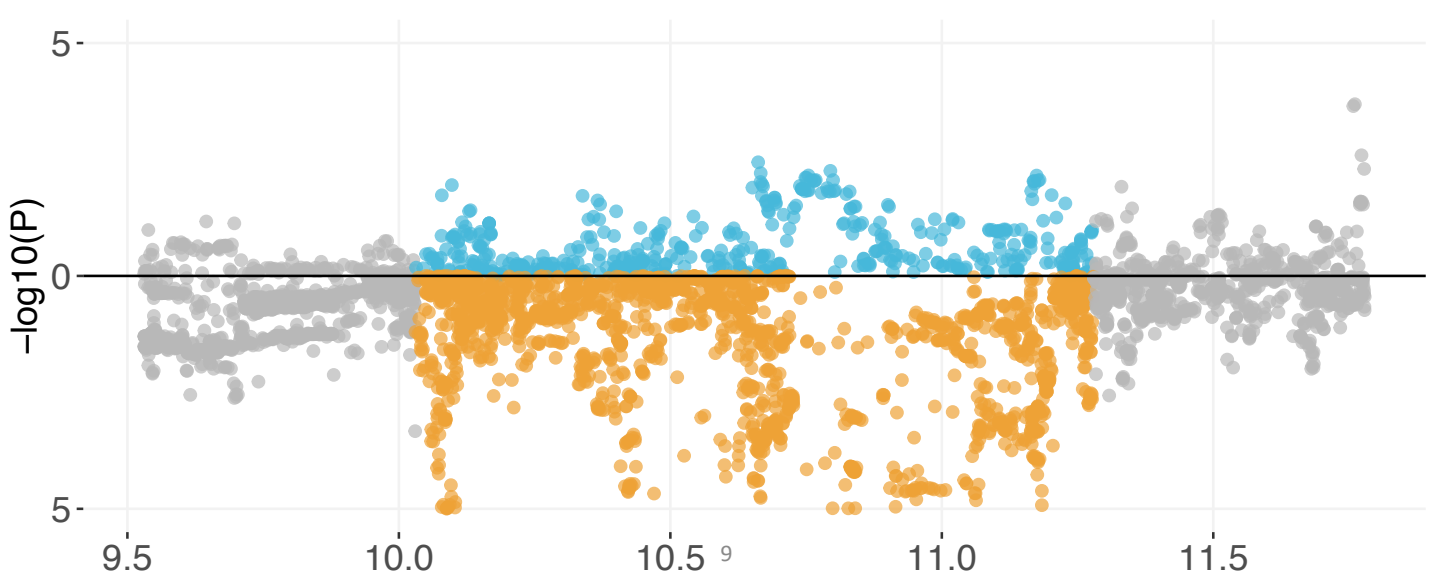

**IPF vs GERD at chromosome 20:11014704-11534388**

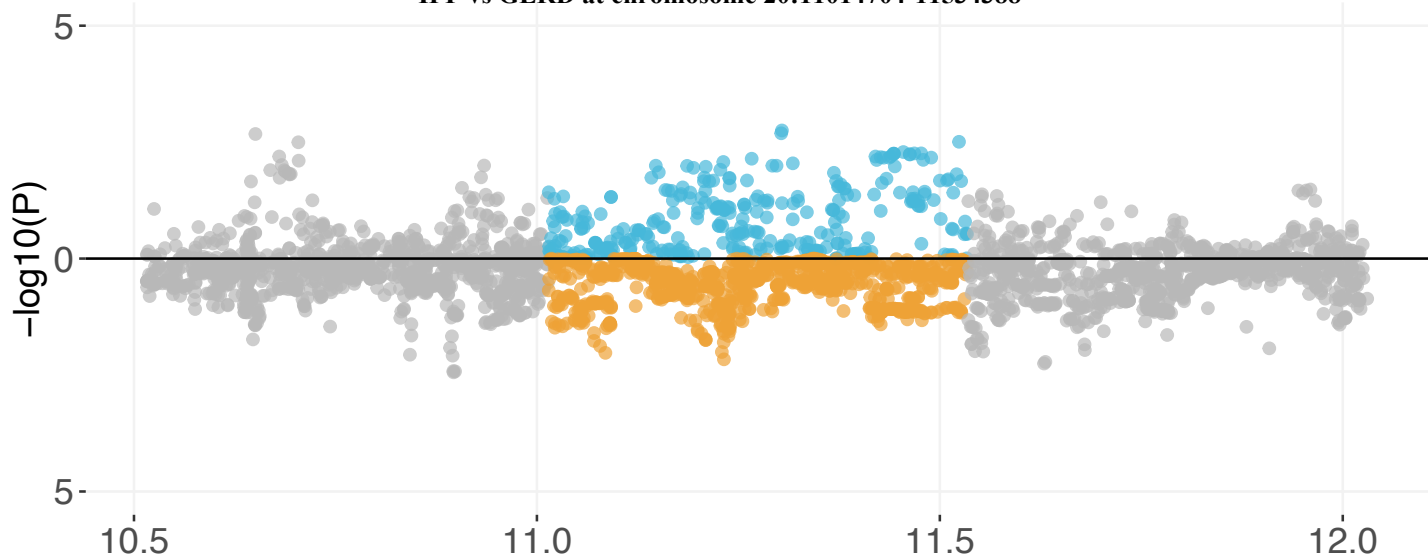

**IPF vs BFP at chromosome 20:62119875-62962870**

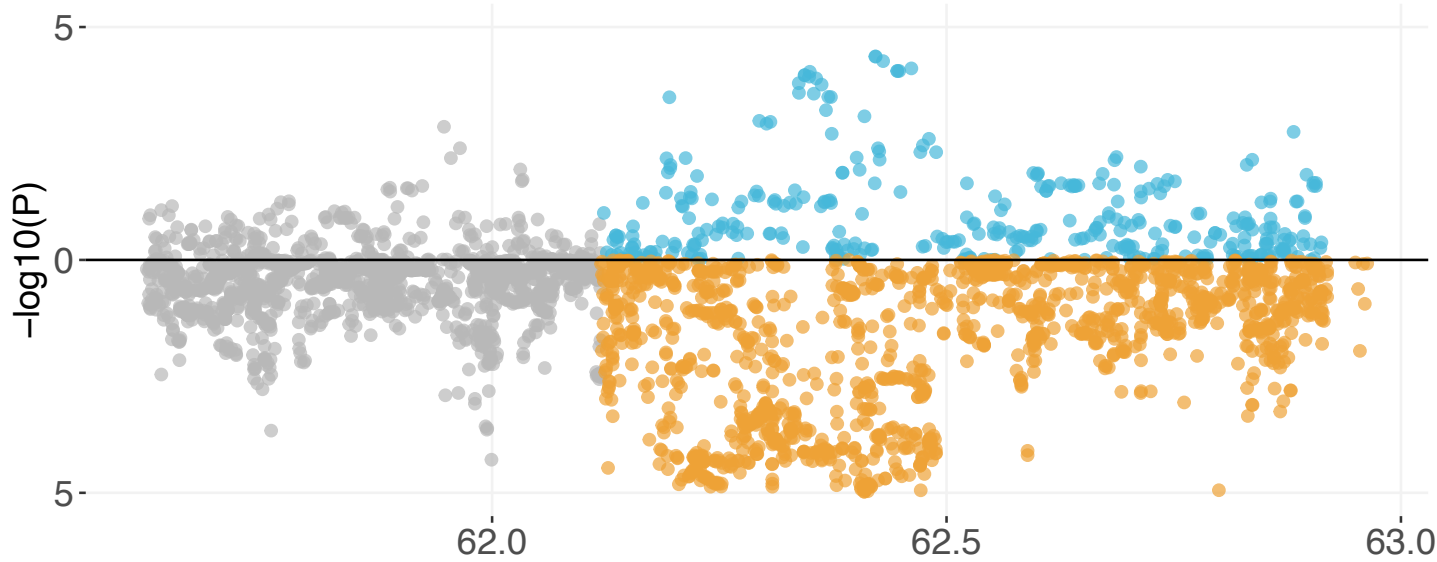

**IPF vs IS at chromosome 20:62119875-62962870**

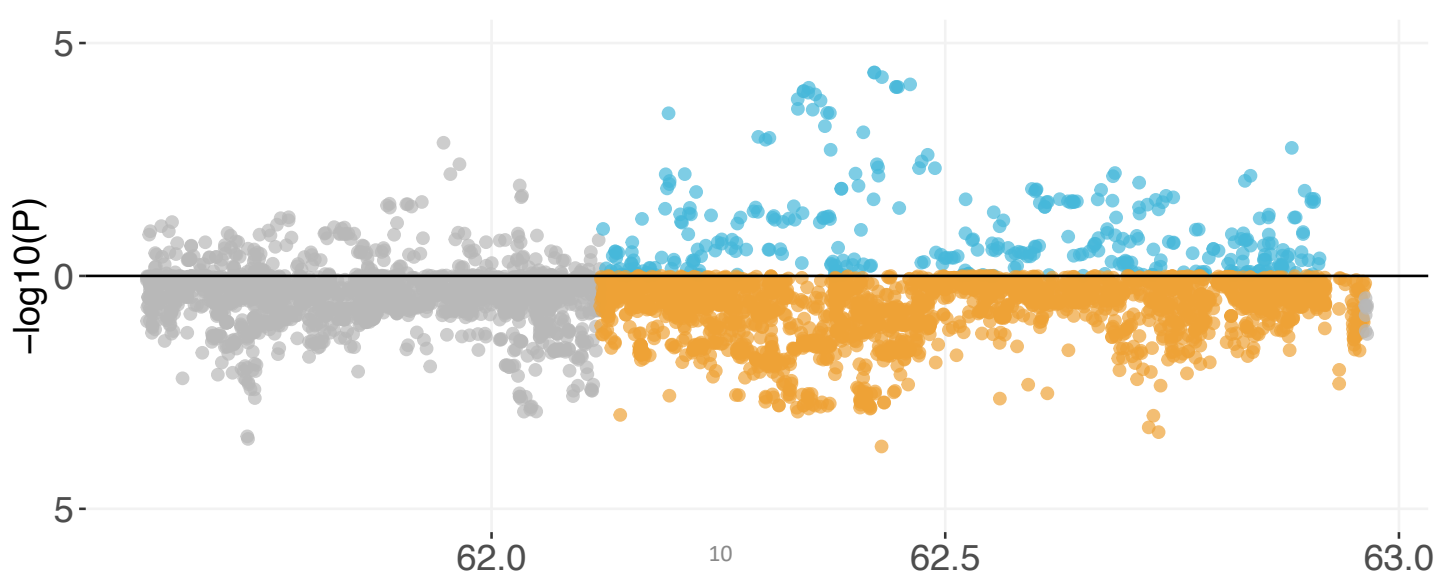

IPF vs WBF at chromosome 20:62119875-62962870

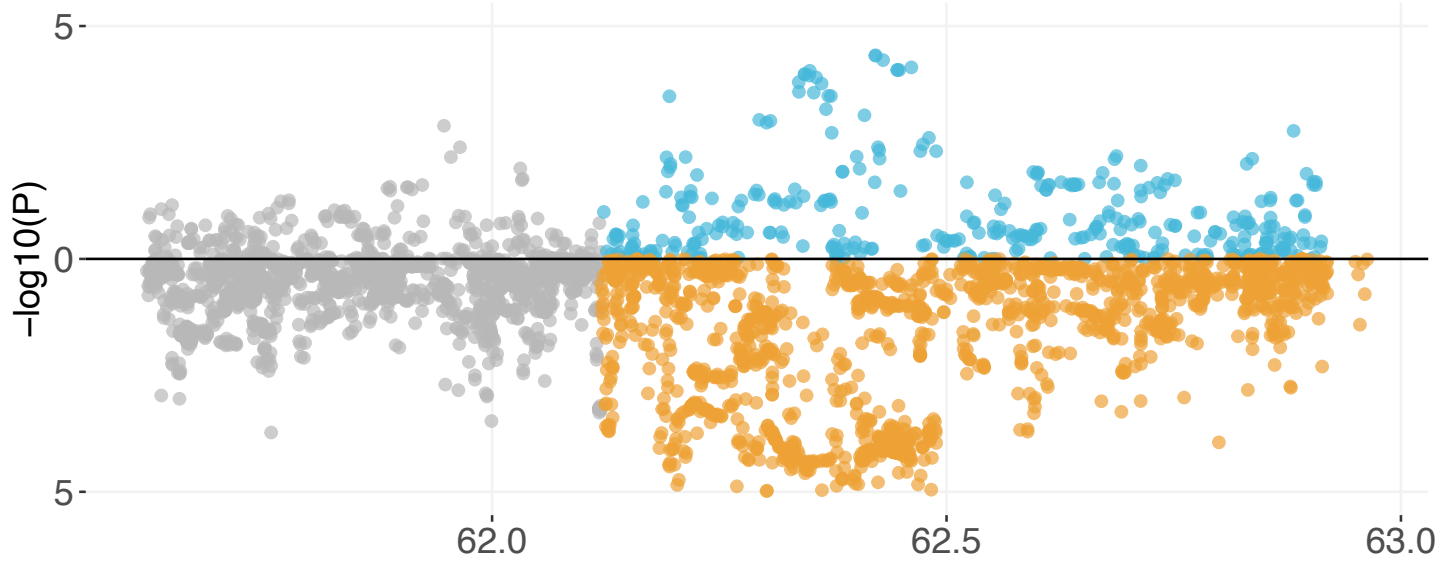

**S Table 1: Phenotype-level correlations between UK Biobank traits and IPF (FDR < 0.05)**

| Phenotype                                                      | R square | P value  | Coefficient | Adjusted P value (FDR) | Adjusted P value (Bonferroni) |
|----------------------------------------------------------------|----------|----------|-------------|------------------------|-------------------------------|
| Doctor diagnosed fibrosing alveolitis/unspecified alveolitis   | 0.046    | 4.66E-36 | 5.57        | 3.12E-33               | 3.12E-33                      |
| Systemic Lupus Erythematosus                                   | 0.011    | 3.40E-18 | 4.46        | 1.14E-15               | 2.27E-15                      |
| Doctor diagnosed emphysema                                     | 0.025    | 8.23E-18 | 3.44        | 1.79E-15               | 5.51E-15                      |
| Doctor diagnosed bronchiectasis                                | 0.029    | 1.07E-17 | 2.78        | 1.79E-15               | 7.16E-15                      |
| Doctor diagnosed COPD                                          | 0.029    | 1.75E-16 | 2.49        | 2.34E-14               | 1.17E-13                      |
| Number of treatments/medications taken                         | 0.025    | 4.72E-14 | 0.18        | 5.26E-12               | 3.16E-11                      |
| Doctor diagnosed tuberculosis                                  | 0.015    | 2.43E-10 | 2.70        | 2.32E-08               | 1.63E-07                      |
| Age at recruitment                                             | 0.033    | 3.29E-10 | 0.12        | 2.75E-08               | 2.20E-07                      |
| Year of birth                                                  | 0.032    | 4.34E-10 | -0.11       | 3.23E-08               | 2.90E-07                      |
| Doctor diagnosed sarcoidosis                                   | 0.013    | 7.38E-09 | 2.68        | 4.94E-07               | 4.94E-06                      |
| Nap during day                                                 | 0.017    | 6.41E-08 | 0.85        | 3.65E-06               | 4.29E-05                      |
| Lymphocyte percentage                                          | 0.020    | 6.56E-08 | 0.00        | 3.65E-06               | 4.39E-05                      |
| Number of self-reported non-cancer illnesses                   | 0.013    | 7.10E-08 | 0.20        | 3.65E-06               | 4.75E-05                      |
| Albumin                                                        | 0.012    | 1.27E-07 | -0.17       | 6.07E-06               | 8.50E-05                      |
| Medication for cholesterol, blood pressure or diabetes         | 0.032    | 2.19E-07 | 0.44        | 9.77E-06               | 0.00014651                    |
| Long-standing illness, disability or infirmity                 | 0.017    | 4.57E-07 | 1.07        | 1.91E-05               | 0.00030573                    |
| Taking other prescription medications                          | 0.018    | 7.43E-07 | 1.22        | 2.92E-05               | 0.00049707                    |
| C_reactive_protein                                             | 0.006    | 8.55E-07 | 0.04        | 3.18E-05               | 0.000572                      |
| Doctor diagnosed cystic fibrosis                               | 0.008    | 2.12E-06 | 6.73        | 7.46E-05               | 0.00141828                    |
| Red blood cell (erythrocyte) distribution width                | 0.010    | 3.66E-06 | 0.00        | 0.00012                | 0.00244854                    |
| Other serious medical condition/disability diagnosed by doctor | 0.013    | 4.20E-06 | 0.99        | 0.00013                | 0.0028098                     |
| Neutrophill count                                              | 0.011    | 7.36E-06 | 0.00        | 0.00022                | 0.00492384                    |
| Cystatin_C                                                     | 0.004    | 1.49E-05 | 0.74        | 0.00043                | 0.0099681                     |
| Chest pain or discomfort                                       | 0.010    | 1.81E-05 | 0.97        | 0.00050                | 0.0121089                     |
| Overall health rating                                          | 0.010    | 4.88E-05 | 0.55        | 0.0013                 | 0.0326472                     |
| Total Cholesterol                                              | 0.006    | 1.00E-04 | -0.31       | 0.0026                 | 0.0669                        |
| White blood cell (leukocyte) count                             | 0.008    | 0.00016  | 0.00        | 0.0038                 | 0.10382679                    |
| Monocyte count                                                 | 0.005    | 0.00017  | 0.01        | 0.0041                 | 0.11571626                    |
| COPD                                                           | 0.005    | 0.00020  | 0.75        | 0.0047                 | 0.13556081                    |
| Waist circumference                                            | 0.008    | 0.00029  | 0.03        | 0.0064                 | 0.19288675                    |
| LC                                                             | 0.003    | 0.00037  | 1.81        | 0.0079                 | 0.24563071                    |
| Eosinophill count                                              | 0.006    | 0.00045  | 0.02        | 0.0094                 | 0.30113965                    |
| Forced vital capacity (FVC)                                    | 0.009    | 0.00057  | -0.44       | 0.011                  | 0.37820912                    |
| LDL                                                            | 0.005    | 0.00064  | -0.36       | 0.013                  | 0.42796131                    |
| Forced vital capacity (FVC), Best measure                      | 0.011    | 0.00077  | 0.00        | 0.015                  | 0.51550531                    |
| Forced expiratory volume in 1-second (FEV1)                    | 0.009    | 0.00091  | -0.53       | 0.017                  | 0.60714292                    |
| Diabetes diagnosed by doctor                                   | 0.005    | 0.00092  | 1.06        | 0.017                  | 0.61433467                    |
| Surgery on leg arteries (other than for varicose veins)        | 0.034    | 0.0010   | -2.91       | 0.018                  | 0.69112182                    |
| Average monthly intake of other alcoholic drinks               | 0.033    | 0.0013   | 0.38        | 0.021                  | 0.84787655                    |
| Doctor diagnosed alpha-1 antitrypsin deficiency                | 0.003    | 0.0013   | 3.29        | 0.021                  | 0.854503                      |
| Creatinine                                                     | 0.002    | 0.0014   | 0.00        | 0.023                  | 0.92877337                    |
| Forced expiratory volume in 1-second (FEV1), Best measure      | 0.009    | 0.0017   | -0.01       | 0.027                  | 1                             |
| Eye problems/disorders                                         | 0.013    | 0.0017   | 0.16        | 0.027                  | 1                             |
| IGF_1                                                          | 0.004    | 0.0024   | -0.05       | 0.036                  | 1                             |
| Neutrophill percentage                                         | 0.007    | 0.0026   | 0.00        | 0.039                  | 1                             |
| Other eye problems                                             | 0.005    | 0.0034   | 0.72        | 0.049                  | 1                             |

**S Table 2: Correlations between UK Biobank traits and IPF polygenic risk score (FDR < 0.05)**

| Phenotype                                  | R square  | P value  | Coefficient | Adjusted P value (FDR) | Adjusted P value (Bonferroni) |
|--------------------------------------------|-----------|----------|-------------|------------------------|-------------------------------|
| Monocyte percentage                        | -5.59E-06 | 7.46E-09 | 1.69E-10    | 4.99E-06               | 4.99E-06                      |
| Monocyte count                             | -3.11E-06 | 1.63E-05 | 1.51E-09    | 0.00545235             | 0.0109047                     |
| Mean corpuscular haemoglobin concentration | -2.57E-06 | 8.75E-05 | -2.72E-10   | 0.0195125              | 0.0585375                     |



**S Table 3: Global genetic correlations between UK Biobank traits and IPF (FDR < 0.05)**

| Trait                                                                        | h <sup>2</sup> | Rho corrected | Corr corrected | Pvalue corrected | p_fdr |
|------------------------------------------------------------------------------|----------------|---------------|----------------|------------------|-------|
| Fibroblastic disorders                                                       | 0.017          | 0.027         | 0.42           | 1.50E-06         | 0.001 |
| Ischaemic Stroke                                                             | 0.062          | 0.051         | 0.41           | 1.09E-05         | 0.002 |
| Palmar fascial fibromatosis [Dupuytren]                                      | 0.017          | 0.024         | 0.36           | 1.80E-05         | 0.002 |
| Other/unspecified dorsalgia                                                  | 0.004          | -0.016        | -0.51          | 4.72E-05         | 0.004 |
| Body Mass Index                                                              | 0.164          | 0.024         | 0.17           | 6.14E-05         | 0.004 |
| Arm fat percentage                                                           | 0.194          | 0.030         | 0.13           | 6.20E-05         | 0.004 |
| Diagnoses - main ICD10: S42 Fracture of shoulder and upper arm               | 0.002          | 0.014         | 0.66           | 7.70E-05         | 0.004 |
| Insomnia                                                                     | 0.042          | -0.026        | -0.25          | 0.00021          | 0.010 |
| Type 2 diabetes with ophthalmic complications                                | 0.001          | 0.013         | 0.69           | 0.00025          | 0.010 |
| Body fat percentage                                                          | 0.200          | 0.036         | 0.16           | 0.00026          | 0.010 |
| Whole body fat mass                                                          | 0.207          | 0.033         | 0.14           | 0.00041          | 0.014 |
| Total protein (quantile)                                                     | 0.190          | 0.006         | 0.03           | 0.00044          | 0.014 |
| Hip circumference                                                            | 0.193          | 0.036         | 0.16           | 0.00065          | 0.019 |
| Diagnoses - main ICD10: E04 Other non-toxic goitre                           | 0.005          | -0.013        | -0.34          | 0.00075          | 0.019 |
| Diseases of the nervous system                                               | 0.014          | 0.013         | 0.21           | 0.00078          | 0.019 |
| Malignant neoplasm of respiratory system and intrathoracic organs            | 0.003          | 0.019         | 0.72           | 0.00085          | 0.019 |
| Diagnoses - main ICD10: C34 Malignant neoplasm of bronchus and lung          | 0.003          | 0.014         | 0.53           | 0.00086          | 0.019 |
| Malignant melanoma of skin                                                   | 0.004          | 0.016         | 0.50           | 0.00089          | 0.019 |
| Diagnoses - main ICD10: K52 Other non-infective gastro-enteritis and colitis | 0.006          | 0.012         | 0.32           | 0.00113          | 0.023 |
| Creatinine (quantile)                                                        | 0.187          | -0.005        | -0.02          | 0.00165          | 0.030 |
| SHBG (quantile)                                                              | 0.185          | -0.005        | -0.02          | 0.00169          | 0.030 |
| Diagnoses - main ICD10: C61 Malignant neoplasm of prostate                   | 0.010          | -0.014        | -0.27          | 0.00175          | 0.030 |
| Non-cancer illness code, self-reported: prolapsed disc/slipped disc          | 0.007          | 0.013         | 0.30           | 0.00182          | 0.030 |
| Non-cancer illness code, self-reported: rheumatoid arthritis                 | 0.012          | -0.014        | -0.26          | 0.00257          | 0.039 |
| Hernia                                                                       | 0.017          | -0.019        | -0.29          | 0.00264          | 0.039 |
| Asthma-related pneumonia                                                     | 0.003          | 0.012         | 0.40           | 0.00344          | 0.049 |

**S Table 4: Significant local regions from SUPERGNOVA (FDR < 0.05)**

| GRCh37 Chr | GRCh37 Start | GRCh37 End | Rho        | Correlation  | IPF h <sup>2</sup> | Trait h <sup>2</sup> | Variance | P value  | Number of SNP | Trait      | Adjusted p value |
|------------|--------------|------------|------------|--------------|--------------------|----------------------|----------|----------|---------------|------------|------------------|
| 2          | 100197638    | 101338509  | 0.0009181  | 1.076084853  | 0.0022             | 0.00033              | 5.37E-08 | 7.41E-05 | 450           | BFP        | 0.040            |
| 4          | 48227642     | 53412129   | -0.0004397 | -1.148381067 | 0.0007             | 0.00020              | 1.29E-08 | 1.07E-04 | 398           | HC         | 0.048            |
| 4          | 48227642     | 53412129   | -0.0004624 | -1.171372833 | 0.0007             | 0.00022              | 1.37E-08 | 7.64E-05 | 398           | WBF        | 0.040            |
| 4          | 145024452    | 148047972  | 0.00152152 | 1.319656624  | 0.0027             | 0.00049              | 1.36E-07 | 3.64E-05 | 800           | BD         | 0.027            |
| 4          | 145024452    | 148047972  | 0.00153375 | 0.893286257  | 0.0030             | 0.00099              | 1.11E-07 | 4.35E-06 | 822           | HC         | 0.007            |
| 7          | 71874997     | 73996533   | -0.000992  | -1.390732517 | 0.0034             | 0.00015              | 5.61E-08 | 2.83E-05 | 388           | LC-Adeno   | 0.026            |
| 7          | 71874997     | 73996533   | -0.0012313 | -1.020456228 | 0.0032             | 0.00045              | 8.41E-08 | 2.19E-05 | 358           | LC-Overall | 0.025            |
| 7          | 124155319    | 125386718  | 0.00031845 | 1.622580856  | 0.0027             | 0.00001              | 5.96E-09 | 3.71E-05 | 376           | GERD       | 0.027            |
| 7          | 124155319    | 125386718  | -0.0010126 | -0.9591298   | 0.0028             | 0.00040              | 3.55E-08 | 7.66E-08 | 376           | LC-Adeno   | 0.000            |
| 7          | 124155319    | 125386718  | -0.0011691 | -1.0546343   | 0.0028             | 0.00044              | 7.35E-08 | 1.62E-05 | 376           | LC-Ever    | 0.018            |
| 7          | 124155319    | 125386718  | -0.0003354 | -1.264624298 | 0.0027             | 0.00003              | 5.57E-09 | 7.04E-06 | 376           | PC         | 0.010            |
| 7          | 124155319    | 125386718  | -0.000337  | -1.2474198   | 0.0027             | 0.00003              | 4.69E-09 | 8.73E-07 | 376           | SKIN       | 0.003            |
| 8          | 108646968    | 110761074  | 0.00140409 | 1.095712503  | 0.0021             | 0.00077              | 6.49E-08 | 3.55E-08 | 722           | FIBRO      | 0.000            |
| 8          | 108646968    | 110761074  | 0.00138822 | 1.09978966   | 0.0021             | 0.00074              | 6.24E-08 | 2.77E-08 | 722           | PFF        | 0.000            |
| 10         | 118417453    | 119697663  | 0.00076178 | 3.466637912  | 0.0001             | 0.00040              | 3.44E-08 | 4.04E-05 | 596           | BFP        | 0.028            |
| 10         | 118417453    | 119697663  | 0.00063527 | 4.373532223  | 0.0001             | 0.00029              | 2.12E-08 | 1.25E-05 | 521           | BMI        | 0.016            |
| 10         | 118417453    | 119697663  | 0.0008632  | 3.646813319  | 0.0001             | 0.00046              | 3.41E-08 | 2.93E-06 | 596           | WBF        | 0.006            |
| 12         | 97439589     | 99220284   | -0.0007808 | -1.618998426 | 0.0006             | 0.00036              | 3.71E-08 | 5.02E-05 | 801           | BMI        | 0.032            |
| 12         | 97439589     | 99220284   | -0.0009282 | -2.074365504 | 0.0004             | 0.00046              | 4.93E-08 | 2.90E-05 | 873           | HC         | 0.026            |
| 13         | 40181792     | 41773356   | 0.00071865 | 0.754733444  | 0.0037             | 0.00025              | 3.24E-08 | 6.52E-05 | 629           | HC         | 0.039            |
| 14         | 93379151     | 94420996   | 0.00054221 | 1.748899691  | 0.0002             | 0.00050              | 1.93E-08 | 9.68E-05 | 397           | BMI        | 0.045            |
| 18         | 45314528     | 46208355   | 0.00043225 | 1.446763395  | 0.0014             | 0.00006              | 1.20E-08 | 8.24E-05 | 410           | PC         | 0.042            |
| 19         | 10030690     | 11279257   | -0.0018445 | -1.247563343 | 0.0015             | 0.00141              | 1.53E-07 | 2.40E-06 | 361           | BD         | 0.006            |
| 19         | 10030690     | 11279257   | 0.00105941 | 1.132095119  | 0.0016             | 0.00053              | 5.17E-08 | 3.17E-06 | 423           | HC         | 0.006            |
| 20         | 11014704     | 11534388   | -0.0003089 | -1.68816263  | 0.0019             | 0.00002              | 6.20E-09 | 8.78E-05 | 288           | GERD       | 0.043            |
| 20         | 62119875     | 62962870   | 0.00137656 | 0.893169382  | 0.0054             | 0.00044              | 1.09E-07 | 2.94E-05 | 322           | BFP        | 0.026            |
| 20         | 62119875     | 62962870   | 0.00225362 | 1.068203883  | 0.0054             | 0.00083              | 2.94E-07 | 3.28E-05 | 324           | IS         | 0.027            |
| 20         | 62119875     | 62962870   | 0.00114659 | 0.871566982  | 0.0054             | 0.00032              | 8.26E-08 | 6.64E-05 | 322           | WBF        | 0.039            |

**S Table 5: TWAS UTMOST significant genes from joint analysis of 44 tissues from GTEx**

| Gene     | Test score | p value  | GRCh37 chromosome | GRCh37 position     | Adjusted p value | Identified GWAS hit | Identified DEG |
|----------|------------|----------|-------------------|---------------------|------------------|---------------------|----------------|
| AKAP13   | 18.22      | 7.94E-09 | 15                | 85923802-86292586   | 3.10E-03         | T                   | T              |
| ANO9     | 31.33      | 7.11E-15 | 11                | 417930-442011       | 2.78E-09         |                     | T              |
| ARHGAP27 | 25.90      | 2.15E-12 | 17                | 43471268-43511787   | 8.38E-07         | T                   | T              |
| ARL17A   | 16.71      | 1.18E-08 | 17                | 43697710-43913194   | 4.62E-03         |                     |                |
| B4GALNT4 | 15.85      | 4.58E-08 | 11                | 369795-382117       | 1.79E-02         |                     | T              |
| BAHD1    | 26.24      | 2.26E-12 | 15                | 40731920-40760441   | 8.84E-07         |                     |                |
| BMF      | 133.41     | 1.83E-11 | 15                | 40380091-40401093   | 7.14E-06         |                     |                |
| BRSK2    | 125.77     | 4.15E-10 | 11                | 1411129-1483919     | 1.62E-04         | T                   |                |
| CDHR5    | 28.26      | 4.36E-13 | 11                | 616565-626078       | 1.70E-07         |                     |                |
| CNPY4    | 14.97      | 1.01E-07 | 7                 | 99717236-99723134   | 3.96E-02         |                     | T              |
| CRHR1    | 23.95      | 2.71E-11 | 17                | 43697710-43913194   | 1.06E-05         | T                   |                |
| CTSD     | 106.87     | 4.09E-11 | 11                | 1773982-1785222     | 1.60E-05         |                     | T              |
| DEPTOR   | 17.37      | 1.03E-08 | 8                 | 120885900-121063157 | 4.04E-03         | T                   |                |
| EFCAB4A  | 19.81      | 8.39E-10 | 11                | 826144-831991       | 3.28E-04         |                     | T              |
| FAM13A   | 21.22      | 2.84E-10 | 4                 | 89647106-90032549   | 1.11E-04         | T                   | T              |
| GJC1     | 23.99      | 1.09E-11 | 17                | 42875816-42908184   | 4.24E-06         |                     |                |
| HRAS     | 15.22      | 6.70E-08 | 11                | 532242-537287       | 2.62E-02         |                     |                |
| IRF7     | 120.20     | 2.22E-11 | 11                | 612553-615999       | 8.67E-06         |                     | T              |
| KRTAP5-1 | 77.98      | 2.50E-11 | 11                | 1605572-1606513     | 9.77E-06         |                     | T              |
| LMNTD2   | 15.87      | 7.04E-08 | 11                | 554850-560779       | 2.75E-02         |                     |                |
| LRRC37A  | 667.77     | 2.27E-11 | 17                | 44370099-44415160   | 8.85E-06         | T                   |                |
| MAFK     | 15.58      | 5.12E-08 | 7                 | 1570350-1582679     | 2.00E-02         |                     |                |
| MAPT     | 305.78     | 2.06E-11 | 17                | 43971748-44105700   | 8.04E-06         | T                   |                |
| MYNN     | 507.64     | 2.34E-11 | 3                 | 169490619-169507504 | 9.13E-06         |                     | T              |
| PAK6     | 161.50     | 3.45E-08 | 4                 | 40509629-40569688   | 1.35E-02         |                     |                |
| PKD2     | 17.99      | 8.56E-09 | 4                 | 88928799-88998931   | 3.34E-03         |                     | T              |
| PLEKHM1  | 340.62     | 2.36E-11 | 17                | 43513266-43568146   | 9.23E-06         |                     | T              |
| PPM1K    | 16.49      | 5.33E-08 | 4                 | 89178772-89205921   | 2.08E-02         |                     | T              |
| PRR33    | 488.77     | 1.98E-11 | 11                | 1910375-1912084     | 7.72E-06         |                     |                |
| SCT      | 83.37      | 1.09E-11 | 11                | 626313-627173       | 4.26E-06         |                     |                |
| SEMA6B   | 18.90      | 6.27E-09 | 19                | 4542600-4559820     | 2.45E-03         |                     | T              |
| SLC25A22 | 454.56     | 2.36E-11 | 11                | 790475-798316       | 9.21E-06         |                     |                |
| SNCA     | 26.87      | 9.93E-13 | 4                 | 90645250-90759466   | 3.88E-07         |                     | T              |
| TNNT3    | 26.57      | 6.56E-12 | 11                | 1940792-1959936     | 2.56E-06         |                     |                |
| WNT3     | 347.42     | 4.12E-11 | 17                | 44839872-44910520   | 1.61E-05         |                     | T              |
| WNT9B    | 23.30      | 4.25E-11 | 17                | 44910567-44964096   | 1.66E-05         |                     | T              |

**S Table 6: Differential gene expression analysis of candidate genes using PulmonDB data**

| Gene     | Study    | Mean   | T statistic | df  | P value    | Adjusted P value (Bonferroni) | UTMOST effect size in lung | UTMOST P value in lung |
|----------|----------|--------|-------------|-----|------------|-------------------------------|----------------------------|------------------------|
| CDHR5    | GSE32537 | 0.086  | 20.69       | 215 | 4.67E-53   | 4.90E-51                      | -0.47                      | 0.051                  |
| LMNTD2   | GSE32537 | -0.097 | -18.04      | 215 | 6.31E-45   | 6.62E-43                      |                            |                        |
| B4GALNT4 | GSE32537 | -0.071 | -17.44      | 215 | 5.09E-43   | 5.35E-41                      | 66.09                      | 0.015                  |
| SLC25A22 | GSE48149 | -1.023 | -22.63      | 51  | 2.92E-28   | 3.07E-26                      | 27.24                      | 3.94E-26               |
| HRAS     | GSE48149 | -0.325 | -19.20      | 51  | 5.40E-25   | 5.67E-23                      | 0.30                       | 0.002                  |
| B4GALNT4 | GSE38958 | -0.161 | -13.22      | 113 | 1.11E-24   | 1.16E-22                      | 66.09                      | 0.015                  |
| CDHR5    | GSE38958 | -0.113 | -12.42      | 113 | 7.34E-23   | 7.71E-21                      | -0.47                      | 0.051                  |
| B4GALNT4 | GSE48149 | 0.345  | 13.87       | 51  | 6.12E-19   | 6.42E-17                      | 66.09                      | 0.015                  |
| SCT      | GSE38958 | -0.146 | -10.26      | 113 | 7.55E-18   | 7.93E-16                      | 0.01                       | 0.004                  |
| SLC25A22 | GSE53845 | 0.171  | 9.34        | 93  | 5.06E-15   | 5.31E-13                      | 27.24                      | 3.94E-26               |
| B4GALNT4 | GSE53845 | -0.157 | -8.67       | 93  | 1.34E-13   | 1.40E-11                      | 66.09                      | 0.015                  |
| LMNTD2   | GSE38958 | -0.096 | -7.97       | 113 | 1.37E-12   | 1.44E-10                      |                            |                        |
| LMNTD2   | GSE53845 | -0.084 | -7.86       | 93  | 6.74E-12   | 7.08E-10                      |                            |                        |
| SLC25A22 | GSE45686 | 0.949  | 9.32        | 37  | 3.05E-11   | 3.20E-09                      | 27.24                      | 3.94E-26               |
| HRAS     | GSE53845 | -0.057 | -7.39       | 93  | 6.29E-11   | 6.60E-09                      | 0.30                       | 0.002                  |
| SLC25A22 | GSE38958 | -0.076 | -7.05       | 113 | 1.53E-10   | 1.60E-08                      | 27.24                      | 3.94E-26               |
| SCT      | GSE32537 | -0.037 | -6.48       | 215 | 6.04E-10   | 6.34E-08                      | 0.01                       | 0.004                  |
| SCT      | GSE53845 | -0.079 | -6.45       | 93  | 4.89E-09   | 5.14E-07                      | 0.01                       | 0.004                  |
| SLC25A22 | GSE32537 | -0.044 | -5.90       | 215 | 1.42E-08   | 1.50E-06                      | 27.24                      | 3.94E-26               |
| B4GALNT4 | GSE21369 | 0.083  | 5.63        | 27  | 5.57E-06   | 0.00058456                    | 66.09                      | 0.015                  |
| POT1     | GSE32537 | 0.038  | 4.43        | 215 | 1.50E-05   | 0.00157869                    | -1.48                      | 0.231                  |
| SLC25A22 | GSE21369 | -0.291 | -5.18       | 27  | 1.88E-05   | 0.00197608                    | 27.24                      | 3.94E-26               |
| POT1     | GSE48149 | 0.030  | 4.58        | 51  | 2.99E-05   | 0.00314272                    | -1.48                      | 0.231                  |
| HRAS     | GSE52463 | -0.444 | -5.61       | 13  | 8.42E-05   | 0.00884564                    | 0.30                       | 0.002                  |
| SCT      | GSE21369 | 0.096  | 4.47        | 27  | 0.00012689 | 0.01332393                    | 0.01                       | 0.004                  |
| SLC25A22 | GSE52463 | -0.455 | -4.77       | 13  | 0.00036662 | 0.03849502                    | 27.24                      | 3.94E-26               |

**S Table 7A: Partitioned heritability results of traits used in MTAG. P values are adjusted using Bonferroni correction**

| IMPACT index | Tissue     | Cell Deriv | Trait | Enrichment | Adjusted P value |
|--------------|------------|------------|-------|------------|------------------|
| 432          | Blood      | B cell     | AFP   | 1.414594   | 3.22E-01         |
|              |            |            | BFP   | 1.381341   | 3.59E-01         |
|              |            |            | HC    | 1.433832   | 2.08E-01         |
|              |            |            | WBF   | 1.387299   | 1.67E-01         |
|              |            |            | IPF   | 1.9543399  | 0.215503         |
| 640          | Uterus     | Cervix     | AFP   | 4.683332   | 3.98E-01         |
|              |            |            | BFP   | 4.454029   | 3.81E-01         |
|              |            |            | HC    | 4.940997   | 2.10E-01         |
|              |            |            | WBF   | 4.305172   | 2.16E-01         |
|              |            |            | IPF   | 4.7139771  | 0.5111049        |
| 641          | Stemcell   | Stem cell  | AFP   | 2.584577   | 5.74E-02         |
|              |            |            | BFP   | 2.44071    | 5.29E-02         |
|              |            |            | HC    | 2.621385   | 7.45E-02         |
|              |            |            | WBF   | 2.441791   | 2.41E-01         |
|              |            |            | IPF   | 0.7777278  | 0.8823101        |
| 646          | Liver      | Liver      | AFP   | 1.4834     | 3.21E-01         |
|              |            |            | BFP   | 1.463281   | 1.47E-01         |
|              |            |            | HC    | 1.524422   | 1.88E-01         |
|              |            |            | WBF   | 1.432233   | 6.59E-02         |
|              |            |            | IPF   | 1.2784806  | 0.7912263        |
| 650          | Blood      | Myeloid    | AFP   | 1.646654   | 1.40E-01         |
|              |            |            | BFP   | 1.587917   | 1.92E-01         |
|              |            |            | HC    | 1.730841   | 6.71E-02         |
|              |            |            | WBF   | 1.591209   | 3.90E-01         |
|              |            |            | IPF   | 1.9676699  | 0.5111049        |
| 669          | Fibroblast | Lung       | AFP   | 1.687388   | 1.57E-01         |
|              |            |            | BFP   | 1.67792    | 3.02E-01         |
|              |            |            | HC    | 1.741407   | 2.37E-01         |
|              |            |            | WBF   | 1.608516   | 8.88E-02         |
|              |            |            | IPF   | 1.2534855  | 0.8494849        |

**S Table 7B: *MAFK* Partitioned heritability results of IPF after MTAG. P values are adjusted using Bonferroni correction**

| IMPACT index | Tissue     | Cell Deriv | Trait for MTAG | Enrichment  | Adjusted P value |
|--------------|------------|------------|----------------|-------------|------------------|
| 432          | Blood      | B cell     | AFP            | 1.470080161 | 0.002878912      |
|              |            |            | BFP            | 1.407362643 | 0.013601266      |
|              |            |            | HC             | 1.458294923 | 0.016867131      |
|              |            |            | WBF            | 1.426105821 | 0.022188703      |
| 640          | Uterus     | Cervix     | AFP            | 4.638252288 | 0.007389846      |
|              |            |            | BFP            | 4.171382438 | 0.028723909      |
|              |            |            | HC             | 4.514322749 | 0.014378828      |
|              |            |            | WBF            | 3.992695315 | 0.096248279      |
| 641          | Stemcell   | Stem cell  | AFP            | 2.582370731 | 0.00790598       |
|              |            |            | BFP            | 2.367606463 | 0.025863991      |
|              |            |            | HC             | 2.505947582 | 0.026093808      |
|              |            |            | WBF            | 2.340081324 | 0.074596358      |
| 646          | Liver      | Liver      | AFP            | 1.505094586 | 0.001713691      |
|              |            |            | BFP            | 1.434992768 | 0.01242485       |
|              |            |            | HC             | 1.516976752 | 0.001613822      |
|              |            |            | WBF            | 1.419118026 | 0.051209956      |
| 650          | Blood      | Myeloid    | AFP            | 1.679793221 | 0.095859178      |
|              |            |            | BFP            | 1.579624259 | 0.52228124       |
|              |            |            | HC             | 1.744878055 | 0.094988905      |
|              |            |            | WBF            | 1.590247895 | 0.702155452      |
| 669          | Fibroblast | Lung       | AFP            | 1.737942699 | 4.74E-05         |
|              |            |            | BFP            | 1.672887944 | 0.000122439      |
|              |            |            | HC             | 1.738980327 | 0.000533098      |
|              |            |            | WBF            | 1.617758927 | 0.007663334      |

**S Table 8A: *MAFK* targeted gene set from CHIP-Atlas**

| Index     | Cell type Class       | Cell type | Tissue | Tissue diagnosis/lineage     |
|-----------|-----------------------|-----------|--------|------------------------------|
| SRX150731 | Blood                 | GM12878   | blood  | mesoderm                     |
| SRX186621 | Blood                 | GM12878   | blood  | mesoderm                     |
| SRX150370 | Uterus                | HeLa      | Cervix | Adenocarcinoma               |
| SRX150385 | Liver                 | Hep G2    | Liver  | Carcinoma Hepatocellular     |
| SRX150689 | Liver                 | Hep G2    | Liver  | Carcinoma Hepatocellular     |
| SRX150372 | Pluripotent stem cell | hESC H1   |        |                              |
| SRX150483 | Lung                  | IMR-90    | Lung   | Normal                       |
| SRX150391 | Blood                 | K-562     | Blood  | Leukemia Chronic Myelogenous |
| SRX150493 | Blood                 | K-562     | Blood  | Leukemia Chronic Myelogenous |
| ERX159255 | Digestive tract       | LoVo      | Colon  | Adenocarcinoma               |
| ERX159256 | Digestive tract       | LoVo      | Colon  | Adenocarcinoma               |
| SRX360026 | Digestive tract       | LoVo      | Colon  | Adenocarcinoma               |
| SRX298273 | Blood                 | OCI-LY-7  | Blood  | Lymphoma B-cell              |

**S Table 8B: *SMAD2* targeted gene set from CHIP-Atlas**

| Index      | Cell type Class       | Cell type                        | Tissue         | Tissue diagnosis/lineage |
|------------|-----------------------|----------------------------------|----------------|--------------------------|
| SRX3847778 | Cardiovascular        | Aortic_smooth_muscle_cells       |                |                          |
| SRX3847781 | Cardiovascular        | Aortic_smooth_muscle_cells       |                |                          |
| SRX6476497 | Cardiovascular        | Aortic_smooth_muscle_cells       |                |                          |
| SRX6476500 | Cardiovascular        | Aortic_smooth_muscle_cells       |                |                          |
| SRX702089  | Pluripotent stem cell | hESC_derived_ectodermal_cells    |                |                          |
| SRX064489  | Pluripotent stem cell | hESC_derived_mesendodermal_cells |                |                          |
| SRX064490  | Pluripotent stem cell | hESC_derived_mesendodermal_cells |                |                          |
| SRX084502  | Pluripotent stem cell | hESC_derived_mesendodermal_cells |                |                          |
| SRX084503  | Pluripotent stem cell | hESC_derived_mesendodermal_cells |                |                          |
| SRX702090  | Pluripotent stem cell | hESC_derived_mesendodermal_cells |                |                          |
| SRX702091  | Pluripotent stem cell | hESC_derived_mesendodermal_cells |                |                          |
| SRX2844311 | Pluripotent stem cell | hESC_H1                          |                |                          |
| SRX2844312 | Pluripotent stem cell | hESC_H1                          |                |                          |
| SRX064480  | Pluripotent stem cell | hESC_H9                          |                |                          |
| SRX064481  | Pluripotent stem cell | hESC_H9                          |                |                          |
| SRX084500  | Pluripotent stem cell | hESC_H9                          |                |                          |
| SRX084501  | Pluripotent stem cell | hESC_H9                          |                |                          |
| SRX702088  | Pluripotent stem cell | hESC_HUES64                      |                |                          |
| SRX3592677 | Pluripotent stem cell | hESC_HUES8                       |                |                          |
| SRX3592681 | Pluripotent stem cell | hESC_HUES8                       |                |                          |
| SRX3592685 | Pluripotent stem cell | hESC_HUES8                       |                |                          |
| SRX378126  | Pluripotent stem cell | hESC_WA09                        |                |                          |
| SRX378127  | Pluripotent stem cell | hESC_WA09                        |                |                          |
| SRX6957406 | Kidney                | HGrC1                            |                |                          |
| SRX6957412 | Kidney                | HGrC1                            |                |                          |
| SRX6957413 | Kidney                | HGrC1                            |                |                          |
| SRX6957414 | Kidney                | HGrC1                            |                |                          |
| SRX6957415 | Kidney                | HGrC1                            |                |                          |
| SRX6957436 | Kidney                | HGrC1                            |                |                          |
| SRX6957437 | Kidney                | HGrC1                            |                |                          |
| SRX6957486 | Kidney                | HGrC1                            |                |                          |
| SRX6957491 | Kidney                | HGrC1                            |                |                          |
| SRX6476489 | Cardiovascular        | HUVEC                            | Umbilical Cord | Normal                   |
| SRX6476492 | Cardiovascular        | HUVEC                            | Umbilical Cord | Normal                   |
| SRX6957479 | Gonad                 | KGN                              | Ovary          | Tumor Granulosa Cell     |
| SRX6957483 | Gonad                 | KGN                              | Ovary          | Tumor Granulosa Cell     |
| SRX2245587 | Pancreas              | PANC-1                           | Pancreas/Duct  | Epithelioid Carcinoma    |
| SRX2245588 | Pancreas              | PANC-1                           | Pancreas/Duct  | Epithelioid Carcinoma    |

**S Table 9A: Enrichment of *MAFK* targets in cell-type-specific differentially expressed genes in IPF single cell data. P values are adjusted using Bonferroni correction**

| Annotation       | # genes | Celltype            | P value  | Adjusted P value (Bonferroni) |
|------------------|---------|---------------------|----------|-------------------------------|
| SRX150483.IMR.90 | 64      | Myofibroblast       | 1.89E-50 | 8.45E-48                      |
| SRX150385.Hep_G2 | 55      | Macrophage          | 3.53E-49 | 1.58E-46                      |
| SRX150483.IMR.90 | 54      | Macrophage          | 2.95E-48 | 1.32E-45                      |
| SRX150385.Hep_G2 | 53      | Macrophage_Alveolar | 2.64E-45 | 1.18E-42                      |
| SRX150483.IMR.90 | 53      | Macrophage_Alveolar | 2.64E-45 | 1.18E-42                      |
| SRX150385.Hep_G2 | 66      | Ciliated            | 2.15E-41 | 9.63E-39                      |
| SRX150385.Hep_G2 | 44      | VE_Capillary_B      | 2.56E-40 | 1.15E-37                      |
| SRX150385.Hep_G2 | 51      | Myofibroblast       | 5.61E-40 | 2.51E-37                      |
| SRX150483.IMR.90 | 41      | VE_Capillary_B      | 1.60E-37 | 7.16E-35                      |
| SRX150689.Hep_G2 | 41      | Macrophage          | 2.03E-36 | 9.07E-34                      |
| SRX150391.K.562  | 41      | Macrophage          | 2.03E-36 | 9.07E-34                      |
| SRX150483.IMR.90 | 57      | Ciliated            | 1.15E-35 | 5.13E-33                      |
| SRX150370.HeLa   | 40      | Macrophage          | 1.61E-35 | 7.20E-33                      |
| SRX150483.IMR.90 | 38      | Fibroblast          | 4.51E-35 | 2.02E-32                      |
| SRX150385.Hep_G2 | 46      | ATII                | 5.75E-35 | 2.58E-32                      |
| SRX150483.IMR.90 | 44      | ATII                | 1.97E-33 | 8.81E-31                      |
| SRX150689.Hep_G2 | 38      | Macrophage_Alveolar | 2.60E-32 | 1.17E-29                      |
| SRX150391.K.562  | 38      | Macrophage_Alveolar | 2.60E-32 | 1.17E-29                      |
| SRX150385.Hep_G2 | 35      | Fibroblast          | 2.81E-32 | 1.26E-29                      |
| SRX150689.Hep_G2 | 41      | Myofibroblast       | 4.67E-32 | 2.09E-29                      |
| SRX150370.HeLa   | 50      | Ciliated            | 2.96E-31 | 1.33E-28                      |
| SRX150370.HeLa   | 36      | Macrophage_Alveolar | 1.33E-30 | 5.97E-28                      |
| SRX150689.Hep_G2 | 32      | VE_Capillary_B      | 3.18E-29 | 1.43E-26                      |
| SRX150385.Hep_G2 | 31      | ATI                 | 4.01E-29 | 1.80E-26                      |
| SRX150483.IMR.90 | 31      | ATI                 | 4.01E-29 | 1.80E-26                      |
| SRX150689.Hep_G2 | 44      | Ciliated            | 1.68E-27 | 7.54E-25                      |
| SRX150483.IMR.90 | 19      | ncMonocyte          | 1.14E-26 | 5.10E-24                      |
| SRX150385.Hep_G2 | 24      | Club                | 1.38E-26 | 6.19E-24                      |
| SRX150385.Hep_G2 | 20      | cMonocyte           | 2.97E-26 | 1.33E-23                      |
| SRX150370.HeLa   | 28      | VE_Capillary_B      | 1.41E-25 | 6.32E-23                      |
| SRX150483.IMR.90 | 19      | cMonocyte           | 6.13E-25 | 2.75E-22                      |
| SRX150391.K.562  | 27      | VE_Capillary_B      | 1.14E-24 | 5.11E-22                      |
| SRX150689.Hep_G2 | 31      | ATII                | 1.44E-23 | 6.47E-21                      |
| SRX150370.HeLa   | 30      | Myofibroblast       | 1.78E-23 | 7.99E-21                      |
| SRX150391.K.562  | 30      | Myofibroblast       | 1.78E-23 | 7.99E-21                      |
| SRX150689.Hep_G2 | 25      | Fibroblast          | 4.53E-23 | 2.03E-20                      |
| SRX150370.HeLa   | 30      | ATII                | 8.15E-23 | 3.65E-20                      |
| SRX150689.Hep_G2 | 24      | ATI                 | 1.41E-22 | 6.33E-20                      |
| SRX150391.K.562  | 36      | Ciliated            | 1.56E-22 | 6.97E-20                      |
| SRX150391.K.562  | 29      | ATII                | 4.59E-22 | 2.06E-19                      |
| SRX150370.HeLa   | 23      | Fibroblast          | 3.01E-21 | 1.35E-18                      |

| <b>Annotation</b>  | <b># genes</b> | <b>Celltype</b>     | <b>P value</b> | <b>Adjusted P value (Bonferroni)</b> |
|--------------------|----------------|---------------------|----------------|--------------------------------------|
| SRX150385.Hep_G2   | 18             | cDC2                | 3.94E-21       | 1.76E-18                             |
| SRX150385.Hep_G2   | 15             | neMonocyte          | 4.64E-21       | 2.08E-18                             |
| SRX150483.IMR.90   | 18             | Club                | 5.45E-20       | 2.44E-17                             |
| SRX150391.K.562    | 21             | ATI                 | 8.53E-20       | 3.82E-17                             |
| SRX150370.HeLa     | 15             | cMonocyte           | 1.01E-19       | 4.52E-17                             |
| SRX150391.K.562    | 15             | cMonocyte           | 1.01E-19       | 4.52E-17                             |
| SRX150370.HeLa     | 14             | neMonocyte          | 1.14E-19       | 5.10E-17                             |
| SRX150391.K.562    | 14             | neMonocyte          | 1.14E-19       | 5.10E-17                             |
| SRX150385.Hep_G2   | 14             | Lymphatic           | 1.82E-19       | 8.14E-17                             |
| SRX150483.IMR.90   | 14             | Lymphatic           | 1.82E-19       | 8.14E-17                             |
| SRX150370.HeLa     | 20             | ATI                 | 7.16E-19       | 3.21E-16                             |
| SRX150483.IMR.90   | 16             | cDC2                | 8.07E-19       | 3.62E-16                             |
| SRX150391.K.562    | 20             | Fibroblast          | 1.59E-18       | 7.11E-16                             |
| SRX150385.Hep_G2   | 13             | NK                  | 1.76E-18       | 7.91E-16                             |
| SRX150689.Hep_G2   | 14             | cMonocyte           | 1.98E-18       | 8.88E-16                             |
| SRX150385.Hep_G2   | 11             | VE_Venous           | 4.56E-18       | 2.04E-15                             |
| SRX298273.OCL.LY.7 | 21             | Macrophage_Alveolar | 5.92E-18       | 2.65E-15                             |
| SRX150372.hESC_H1  | 19             | ATI                 | 5.98E-18       | 2.68E-15                             |
| SRX150372.hESC_H1  | 20             | Macrophage          | 7.66E-18       | 3.43E-15                             |
| SRX150385.Hep_G2   | 12             | T_Cytotoxic         | 1.59E-17       | 7.12E-15                             |
| SRX150372.hESC_H1  | 22             | Myofibroblast       | 2.57E-17       | 1.15E-14                             |
| SRX150689.Hep_G2   | 12             | Lymphatic           | 9.82E-17       | 4.40E-14                             |
| SRX150370.HeLa     | 14             | cDC2                | 1.61E-16       | 7.22E-14                             |
| SRX150483.IMR.90   | 10             | VE_Venous           | 1.89E-16       | 8.47E-14                             |
| SRX150385.Hep_G2   | 11             | T                   | 4.27E-16       | 1.91E-13                             |
| SRX150689.Hep_G2   | 11             | NK                  | 1.08E-15       | 4.82E-13                             |
| SRX150689.Hep_G2   | 14             | Club                | 1.21E-15       | 5.43E-13                             |
| SRX150689.Hep_G2   | 11             | neMonocyte          | 1.56E-15       | 7.01E-13                             |
| SRX150372.hESC_H1  | 18             | Macrophage_Alveolar | 1.85E-15       | 8.28E-13                             |
| SRX150689.Hep_G2   | 13             | cDC2                | 2.26E-15       | 1.01E-12                             |
| SRX150391.K.562    | 13             | cDC2                | 2.26E-15       | 1.01E-12                             |
| SRX150372.hESC_H1  | 20             | ATII                | 2.36E-15       | 1.06E-12                             |
| SRX298273.OCL.LY.7 | 17             | Macrophage          | 3.06E-15       | 1.37E-12                             |
| SRX150372.hESC_H1  | 24             | Ciliated            | 3.61E-15       | 1.62E-12                             |
| SRX150483.IMR.90   | 10             | T                   | 1.13E-14       | 5.08E-12                             |
| SRX150391.K.562    | 10             | T                   | 1.13E-14       | 5.08E-12                             |
| SRX150689.Hep_G2   | 10             | T_Cytotoxic         | 1.13E-14       | 5.08E-12                             |
| SRX150372.hESC_H1  | 15             | VE_Capillary_B      | 6.77E-14       | 3.03E-11                             |
| SRX150385.Hep_G2   | 7              | VE_Capillary_A      | 1.05E-13       | 4.69E-11                             |
| SRX150391.K.562    | 12             | Club                | 1.75E-13       | 7.83E-11                             |
| SRX150689.Hep_G2   | 9              | T                   | 2.97E-13       | 1.33E-10                             |
| SRX150391.K.562    | 9              | T_Cytotoxic         | 2.97E-13       | 1.33E-10                             |
| SRX150689.Hep_G2   | 8              | VE_Venous           | 3.06E-13       | 1.37E-10                             |



| Annotation         | # genes | Celltype            | P value  | Adjusted P value (Bonferroni) |
|--------------------|---------|---------------------|----------|-------------------------------|
| SRX150483.IMR.90   | 9       | NK                  | 6.27E-13 | 2.81E-10                      |
| SRX150483.IMR.90   | 5       | DC_Mature           | 2.98E-12 | 1.34E-09                      |
| SRX150385.Hep_G2   | 7       | B                   | 7.05E-12 | 3.16E-09                      |
| SRX150370.HeLa     | 8       | T                   | 7.69E-12 | 3.44E-09                      |
| SRX150370.HeLa     | 8       | T_Cytotoxic         | 7.69E-12 | 3.44E-09                      |
| SRX150391.K.562    | 7       | VE_Venous           | 1.20E-11 | 5.36E-09                      |
| SRX150370.HeLa     | 8       | NK                  | 1.49E-11 | 6.66E-09                      |
| SRX150391.K.562    | 8       | NK                  | 1.49E-11 | 6.66E-09                      |
| SRX298273.OCI.LY.7 | 8       | neMonocyte          | 1.94E-11 | 8.70E-09                      |
| SRX150370.HeLa     | 10      | Club                | 2.47E-11 | 1.10E-08                      |
| SRX298273.OCI.LY.7 | 12      | VE_Capillary_B      | 3.09E-11 | 1.39E-08                      |
| SRX298273.OCI.LY.7 | 14      | Myofibroblast       | 3.16E-11 | 1.42E-08                      |
| SRX186621.GM12878  | 12      | Macrophage          | 6.24E-11 | 2.80E-08                      |
| SRX150483.IMR.90   | 7       | T_Cytotoxic         | 1.96E-10 | 8.80E-08                      |
| SRX360026.LoVo     | 11      | VE_Capillary_B      | 2.37E-10 | 1.06E-07                      |
| SRX298273.OCI.LY.7 | 16      | Ciliated            | 2.59E-10 | 1.16E-07                      |
| SRX150372.hESC_H1  | 7       | neMonocyte          | 4.40E-10 | 1.97E-07                      |
| SRX150370.HeLa     | 6       | VE_Venous           | 4.59E-10 | 2.06E-07                      |
| SRX150689.Hep_G2   | 5       | VE_Capillary_A      | 6.40E-10 | 2.87E-07                      |
| SRX150483.IMR.90   | 5       | VE_Capillary_A      | 6.40E-10 | 2.87E-07                      |
| SRX150385.Hep_G2   | 5       | VE_Arterial         | 1.22E-09 | 5.48E-07                      |
| SRX150372.hESC_H1  | 10      | Fibroblast          | 1.49E-09 | 6.69E-07                      |
| SRX150372.hESC_H1  | 7       | cMonocyte           | 1.74E-09 | 7.81E-07                      |
| SRX298273.OCI.LY.7 | 12      | ATII                | 1.86E-09 | 8.33E-07                      |
| SRX150483.IMR.90   | 4       | VE_Peribronchial    | 2.05E-09 | 9.20E-07                      |
| SRX360026.LoVo     | 10      | Macrophage          | 3.23E-09 | 1.45E-06                      |
| SRX150372.hESC_H1  | 8       | Club                | 3.40E-09 | 1.52E-06                      |
| SRX186621.GM12878  | 11      | Myofibroblast       | 5.84E-09 | 2.62E-06                      |
| SRX186621.GM12878  | 10      | Macrophage_Alveolar | 7.30E-09 | 3.27E-06                      |
| SRX298273.OCI.LY.7 | 9       | ATI                 | 8.15E-09 | 3.65E-06                      |
| SRX150370.HeLa     | 5       | B                   | 1.19E-08 | 5.34E-06                      |
| SRX150689.Hep_G2   | 5       | B                   | 1.19E-08 | 5.34E-06                      |
| SRX150372.hESC_H1  | 5       | B                   | 1.19E-08 | 5.34E-06                      |
| SRX150483.IMR.90   | 5       | B                   | 1.19E-08 | 5.34E-06                      |
| SRX150391.K.562    | 5       | B                   | 1.19E-08 | 5.34E-06                      |
| SRX150391.K.562    | 6       | Lymphatic           | 1.19E-08 | 5.35E-06                      |
| SRX186621.GM12878  | 9       | VE_Capillary_B      | 1.37E-08 | 6.14E-06                      |
| SRX150385.Hep_G2   | 4       | B_Plasma            | 1.60E-08 | 7.16E-06                      |
| SRX150689.Hep_G2   | 4       | B_Plasma            | 1.60E-08 | 7.16E-06                      |
| SRX298273.OCI.LY.7 | 4       | B_Plasma            | 1.60E-08 | 7.16E-06                      |
| SRX298273.OCI.LY.7 | 6       | cMonocyte           | 3.19E-08 | 1.43E-05                      |
| SRX150391.K.562    | 4       | VE_Capillary_A      | 4.73E-08 | 2.12E-05                      |
| SRX360026.LoVo     | 9       | Macrophage_Alveolar | 4.82E-08 | 2.16E-05                      |

| <b>Annotation</b>  | <b># genes</b> | <b>Celltype</b>  | <b>P value</b> | <b>Adjusted P value (Bonferroni)</b> |
|--------------------|----------------|------------------|----------------|--------------------------------------|
| SRX360026.LoVo     | 9              | Myofibroblast    | 1.87E-07       | 8.39E-05                             |
| SRX150372.hESC_H1  | 6              | cDC2             | 1.98E-07       | 8.87E-05                             |
| SRX298273.OCL.LY.7 | 6              | cDC2             | 1.98E-07       | 8.87E-05                             |
| SRX150493.K.562    | 11             | Ciliated         | 2.67E-07       | 0.00011983                           |
| SRX186621.GM12878  | 9              | ATII             | 2.92E-07       | 0.00013062                           |
| SRX150385.Hep_G2   | 3              | VE_Peribronchial | 3.42E-07       | 0.00015311                           |
| SRX186621.GM12878  | 7              | ATI              | 5.24E-07       | 0.00023463                           |
| ERX159256.LoVo     | 7              | VE_Capillary_B   | 7.84E-07       | 0.00035115                           |
| SRX150385.Hep_G2   | 3              | Basal            | 9.99E-07       | 0.00044755                           |
| SRX150689.Hep_G2   | 3              | Basal            | 9.99E-07       | 0.00044755                           |
| SRX150483.IMR.90   | 3              | Basal            | 9.99E-07       | 0.00044755                           |
| SRX150391.K.562    | 3              | Basal            | 9.99E-07       | 0.00044755                           |
| SRX186621.GM12878  | 10             | Ciliated         | 1.07E-06       | 0.00047787                           |
| SRX186621.GM12878  | 3              | B_Plasma         | 1.52E-06       | 0.00068109                           |
| SRX150370.HeLa     | 3              | B_Plasma         | 1.52E-06       | 0.00068109                           |
| SRX150372.hESC_H1  | 3              | B_Plasma         | 1.52E-06       | 0.00068109                           |
| SRX150483.IMR.90   | 3              | B_Plasma         | 1.52E-06       | 0.00068109                           |
| SRX150372.hESC_H1  | 4              | T                | 3.05E-06       | 0.00136475                           |
| SRX298273.OCL.LY.7 | 4              | T                | 3.05E-06       | 0.00136475                           |
| SRX360026.LoVo     | 6              | ATI              | 4.18E-06       | 0.0018714                            |
| SRX150731.GM12878  | 9              | Ciliated         | 4.25E-06       | 0.00190286                           |
| SRX186621.GM12878  | 4              | neMonocyte       | 4.79E-06       | 0.00214577                           |
| SRX360026.LoVo     | 4              | neMonocyte       | 4.79E-06       | 0.00214577                           |
| SRX150689.Hep_G2   | 3              | VE_Arterial      | 4.92E-06       | 0.00220242                           |
| SRX150483.IMR.90   | 3              | VE_Arterial      | 4.92E-06       | 0.00220242                           |
| SRX150391.K.562    | 3              | VE_Arterial      | 4.92E-06       | 0.00220242                           |
| SRX298273.OCL.LY.7 | 6              | Fibroblast       | 5.27E-06       | 0.00236041                           |
| SRX150370.HeLa     | 4              | Lymphatic        | 5.43E-06       | 0.00243475                           |
| SRX298273.OCL.LY.7 | 4              | Lymphatic        | 5.43E-06       | 0.00243475                           |
| SRX150493.K.562    | 6              | Macrophage       | 8.35E-06       | 0.00373943                           |
| ERX159256.LoVo     | 6              | Macrophage       | 8.35E-06       | 0.00373943                           |
| SRX298273.OCL.LY.7 | 3              | B                | 1.86E-05       | 0.00834666                           |
| SRX150372.hESC_H1  | 3              | VE_Venous        | 2.32E-05       | 0.01038319                           |
| SRX150385.Hep_G2   | 2              | DC_Mature        | 3.30E-05       | 0.0147914                            |
| SRX150391.K.562    | 2              | DC_Mature        | 3.30E-05       | 0.0147914                            |
| SRX298273.OCL.LY.7 | 2              | DC_Mature        | 3.30E-05       | 0.0147914                            |
| ERX159256.LoVo     | 5              | ATI              | 3.32E-05       | 0.01487428                           |
| SRX186621.GM12878  | 5              | Fibroblast       | 4.03E-05       | 0.01804221                           |
| SRX150493.K.562    | 6              | ATII             | 4.48E-05       | 0.02008729                           |
| SRX360026.LoVo     | 6              | ATII             | 4.48E-05       | 0.02008729                           |
| SRX150370.HeLa     | 2              | VE_Peribronchial | 5.25E-05       | 0.02353177                           |
| SRX150391.K.562    | 2              | VE_Peribronchial | 5.25E-05       | 0.02353177                           |
| SRX298273.OCL.LY.7 | 2              | VE_Peribronchial | 5.25E-05       | 0.02353177                           |

| <b>Annotation</b>  | <b># genes</b> | <b>Celltype</b>     | <b>P value</b> | <b>Adjusted P value (Bonferroni)</b> |
|--------------------|----------------|---------------------|----------------|--------------------------------------|
| ERX159255.LoVo     | 5              | Macrophage          | 5.91E-05       | 0.02645445                           |
| SRX186621.GM12878  | 4              | Club                | 6.08E-05       | 0.02725246                           |
| SRX360026.LoVo     | 4              | Club                | 6.08E-05       | 0.02725246                           |
| SRX298273.OCL.LY.7 | 4              | Club                | 6.08E-05       | 0.02725246                           |
| SRX150372.hESC_H1  | 3              | T_Cytotoxic         | 7.42E-05       | 0.03323656                           |
| SRX360026.LoVo     | 3              | T_Cytotoxic         | 7.42E-05       | 0.03323656                           |
| SRX150493.K.562    | 5              | Macrophage_Alveolar | 8.85E-05       | 0.03963426                           |
| ERX159256.LoVo     | 5              | Macrophage_Alveolar | 8.85E-05       | 0.03963426                           |
| SRX150372.hESC_H1  | 3              | NK                  | 9.43E-05       | 0.04225825                           |
| SRX360026.LoVo     | 3              | NK                  | 9.43E-05       | 0.04225825                           |
| ERX159256.LoVo     | 3              | ncMonocyte          | 0.00010397     | 0.04657728                           |
| SRX150370.HeLa     | 2              | Basal               | 0.00010505     | 0.04706353                           |
| SRX150372.hESC_H1  | 2              | Basal               | 0.00010505     | 0.04706353                           |

**S Table 9B: Enrichment of *SMAD2* targets in cell-type-specific differentially expressed genes in IPF single cell data. P values are adjusted using Bonferroni correction**

| Annotation            | # genes | Celltype            | P value   | Adjusted P value (Bonferroni) |
|-----------------------|---------|---------------------|-----------|-------------------------------|
| SRX6476489.HUVEC      | 139     | VE_Capillary_B      | 3.14E-138 | 3.92E-135                     |
| SRX6476489.HUVEC      | 127     | Myofibroblast       | 2.22E-104 | 2.77E-101                     |
| SRX6476489.HUVEC      | 114     | Macrophage_Alveolar | 8.64E-102 | 1.08E-98                      |
| SRX6476489.HUVEC      | 107     | Macrophage          | 1.38E-99  | 1.72E-96                      |
| SRX6476489.HUVEC      | 122     | ATII                | 9.17E-97  | 1.14E-93                      |
| SRX6476489.HUVEC      | 80      | Fibroblast          | 6.86E-76  | 8.56E-73                      |
| SRX6476489.HUVEC      | 78      | ATI                 | 2.08E-75  | 2.60E-72                      |
| SRX6476489.HUVEC      | 104     | Ciliated            | 2.88E-66  | 3.60E-63                      |
| SRX6476489.HUVEC      | 41      | Lymphatic           | 1.60E-58  | 1.99E-55                      |
| SRX6476489.HUVEC      | 42      | cDC2                | 7.53E-50  | 9.40E-47                      |
| SRX6476489.HUVEC      | 37      | cMonocyte           | 2.63E-49  | 3.28E-46                      |
| SRX6476489.HUVEC      | 33      | T                   | 5.30E-49  | 6.62E-46                      |
| SRX6476489.HUVEC      | 34      | ncMonocyte          | 1.57E-48  | 1.96E-45                      |
| SRX6476489.HUVEC      | 38      | Club                | 2.40E-42  | 3.00E-39                      |
| SRX064481.hESC_H9     | 39      | ATI                 | 1.04E-36  | 1.30E-33                      |
| SRX6476489.HUVEC      | 25      | T_Cytotoxic         | 1.17E-36  | 1.46E-33                      |
| SRX064481.hESC_H9     | 37      | Macrophage          | 7.86E-33  | 9.81E-30                      |
| SRX6476489.HUVEC      | 16      | VE_Capillary_A      | 1.02E-31  | 1.27E-28                      |
| SRX6476489.HUVEC      | 19      | VE_Venous           | 2.39E-31  | 2.99E-28                      |
| SRX064481.hESC_H9     | 39      | Myofibroblast       | 1.74E-30  | 2.17E-27                      |
| SRX6476489.HUVEC      | 21      | NK                  | 7.75E-30  | 9.67E-27                      |
| SRX3592685.hESC_HUES8 | 33      | Macrophage          | 2.89E-29  | 3.60E-26                      |
| SRX064481.hESC_H9     | 38      | ATII                | 7.40E-29  | 9.24E-26                      |
| SRX064481.hESC_H9     | 46      | Ciliated            | 9.49E-29  | 1.18E-25                      |
| SRX064481.hESC_H9     | 31      | VE_Capillary_B      | 2.61E-28  | 3.26E-25                      |
| SRX3592685.hESC_HUES8 | 37      | ATII                | 4.25E-28  | 5.30E-25                      |
| SRX064481.hESC_H9     | 33      | Macrophage_Alveolar | 4.76E-28  | 5.95E-25                      |
| SRX3592685.hESC_HUES8 | 33      | Macrophage_Alveolar | 4.76E-28  | 5.95E-25                      |
| SRX064481.hESC_H9     | 28      | Fibroblast          | 8.14E-26  | 1.02E-22                      |
| SRX064481.hESC_H9     | 23      | Club                | 1.76E-25  | 2.20E-22                      |
| SRX3592685.hESC_HUES8 | 27      | ATI                 | 2.26E-25  | 2.82E-22                      |
| SRX6476492.HUVEC      | 29      | Macrophage_Alveolar | 1.16E-24  | 1.44E-21                      |
| SRX6476489.HUVEC      | 13      | VE_Arterial         | 1.17E-24  | 1.46E-21                      |
| SRX3592685.hESC_HUES8 | 31      | Myofibroblast       | 3.00E-24  | 3.74E-21                      |
| SRX6476492.HUVEC      | 26      | Macrophage          | 4.39E-23  | 5.47E-20                      |
| SRX3592685.hESC_HUES8 | 24      | VE_Capillary_B      | 5.90E-22  | 7.37E-19                      |
| SRX2844312.hESC_H1    | 22      | ATI                 | 1.01E-20  | 1.26E-17                      |
| SRX3592685.hESC_HUES8 | 33      | Ciliated            | 1.10E-20  | 1.38E-17                      |
| SRX2844312.hESC_H1    | 24      | ATII                | 2.51E-18  | 3.13E-15                      |
| SRX3592681.hESC_HUES8 | 24      | ATII                | 2.51E-18  | 3.13E-15                      |
| SRX6957437.HGrC1      | 19      | Fibroblast          | 1.27E-17  | 1.59E-14                      |
| SRX6476492.HUVEC      | 19      | VE_Capillary_B      | 1.83E-17  | 2.29E-14                      |
| SRX2844312.hESC_H1    | 22      | Myofibroblast       | 2.57E-17  | 3.20E-14                      |
| SRX6476492.HUVEC      | 22      | Myofibroblast       | 2.57E-17  | 3.20E-14                      |

| <b>Annotation</b>     | <b># genes</b> | <b>Celltype</b>  | <b>P value</b> | <b>Adjusted P value (Bonferroni)</b> |
|-----------------------|----------------|------------------|----------------|--------------------------------------|
| SRX064481.hESC_H9     | 13             | cMonocyte        | 3.86E-17       | 4.82E-14                             |
| SRX2844312.hESC_H1    | 18             | VE_Capillary_B   | 1.44E-16       | 1.79E-13                             |
| SRX6957437.HGrC1      | 21             | Myofibroblast    | 1.49E-16       | 1.86E-13                             |
| SRX064481.hESC_H9     | 14             | cDC2             | 1.61E-16       | 2.01E-13                             |
| SRX6476492.HUVEC      | 21             | ATII             | 4.27E-16       | 5.33E-13                             |
| SRX064481.hESC_H9     | 11             | Lymphatic        | 2.24E-15       | 2.80E-12                             |
| SRX3592685.hESC_HUES8 | 11             | Lymphatic        | 2.24E-15       | 2.80E-12                             |
| SRX6476489.HUVEC      | 9              | B                | 3.84E-15       | 4.79E-12                             |
| SRX6957437.HGrC1      | 16             | VE_Capillary_B   | 8.73E-15       | 1.09E-11                             |
| SRX3592685.hESC_HUES8 | 10             | T                | 1.13E-14       | 1.42E-11                             |
| SRX3592677.hESC_HUES8 | 19             | ATII             | 1.30E-14       | 1.62E-11                             |
| SRX6476489.HUVEC      | 7              | B_Plasma         | 1.38E-14       | 1.72E-11                             |
| SRX3592685.hESC_HUES8 | 13             | Club             | 1.46E-14       | 1.82E-11                             |
| SRX6476492.HUVEC      | 23             | Ciliated         | 1.47E-14       | 1.83E-11                             |
| SRX6957437.HGrC1      | 15             | ATI              | 2.81E-14       | 3.51E-11                             |
| SRX064481.hESC_H9     | 10             | ncMonocyte       | 3.66E-14       | 4.57E-11                             |
| SRX3592685.hESC_HUES8 | 15             | Fibroblast       | 5.08E-14       | 6.34E-11                             |
| SRX6476492.HUVEC      | 15             | Fibroblast       | 5.08E-14       | 6.34E-11                             |
| SRX2844312.hESC_H1    | 15             | Macrophage       | 1.64E-13       | 2.04E-10                             |
| SRX3592681.hESC_HUES8 | 17             | Myofibroblast    | 1.67E-13       | 2.09E-10                             |
| SRX3592685.hESC_HUES8 | 10             | cMonocyte        | 2.70E-13       | 3.37E-10                             |
| SRX6476492.HUVEC      | 10             | cMonocyte        | 2.70E-13       | 3.37E-10                             |
| SRX2844312.hESC_H1    | 9              | T                | 2.97E-13       | 3.71E-10                             |
| SRX064481.hESC_H9     | 9              | T                | 2.97E-13       | 3.71E-10                             |
| SRX064481.hESC_H9     | 9              | T_Cytotoxic      | 2.97E-13       | 3.71E-10                             |
| SRX6957437.HGrC1      | 17             | ATII             | 3.90E-13       | 4.86E-10                             |
| SRX2844312.hESC_H1    | 14             | Fibroblast       | 4.00E-13       | 5.00E-10                             |
| SRX3592685.hESC_HUES8 | 9              | ncMonocyte       | 8.48E-13       | 1.06E-09                             |
| SRX3592681.hESC_HUES8 | 14             | Macrophage       | 1.19E-12       | 1.49E-09                             |
| SRX3592677.hESC_HUES8 | 13             | ATI              | 1.89E-12       | 2.36E-09                             |
| SRX3592681.hESC_HUES8 | 13             | Fibroblast       | 3.15E-12       | 3.93E-09                             |
| SRX064480.hESC_H9     | 13             | VE_Capillary_B   | 4.03E-12       | 5.03E-09                             |
| SRX3592685.hESC_HUES8 | 10             | cDC2             | 5.94E-12       | 7.42E-09                             |
| SRX6476489.HUVEC      | 5              | VE_Peribronchial | 1.13E-11       | 1.41E-08                             |
| SRX3592681.hESC_HUES8 | 12             | VE_Capillary_B   | 3.09E-11       | 3.86E-08                             |
| SRX3592677.hESC_HUES8 | 14             | Myofibroblast    | 3.16E-11       | 3.94E-08                             |
| SRX3592677.hESC_HUES8 | 12             | Macrophage       | 6.24E-11       | 7.79E-08                             |
| SRX6957437.HGrC1      | 17             | Ciliated         | 6.44E-11       | 8.04E-08                             |
| SRX064480.hESC_H9     | 11             | ATI              | 1.25E-10       | 1.56E-07                             |
| SRX3592677.hESC_HUES8 | 11             | Fibroblast       | 1.92E-10       | 2.40E-07                             |
| SRX064480.hESC_H9     | 7              | T                | 1.96E-10       | 2.45E-07                             |
| SRX3592681.hESC_HUES8 | 7              | T                | 1.96E-10       | 2.45E-07                             |
| SRX3592685.hESC_HUES8 | 7              | T_Cytotoxic      | 1.96E-10       | 2.45E-07                             |
| SRX2844312.hESC_H1    | 16             | Ciliated         | 2.59E-10       | 3.24E-07                             |
| SRX064481.hESC_H9     | 7              | NK               | 3.49E-10       | 4.35E-07                             |
| SRX3592685.hESC_HUES8 | 7              | NK               | 3.49E-10       | 4.35E-07                             |
| SRX3592681.hESC_HUES8 | 7              | ncMonocyte       | 4.40E-10       | 5.49E-07                             |

| <b>Annotation</b>     | <b># genes</b> | <b>Celltype</b>     | <b>P value</b> | <b>Adjusted P value (Bonferroni)</b> |
|-----------------------|----------------|---------------------|----------------|--------------------------------------|
| SRX6476492.HUVEC      | 7              | neMonocyte          | 4.40E-10       | 5.49E-07                             |
| SRX064480.hESC_H9     | 11             | Macrophage          | 4.50E-10       | 5.61E-07                             |
| SRX6957437.HGrC1      | 6              | VE_Venous           | 4.59E-10       | 5.73E-07                             |
| SRX2844312.hESC_H1    | 7              | Lymphatic           | 5.50E-10       | 6.87E-07                             |
| SRX6476489.HUVEC      | 4              | DC_Mature           | 7.45E-10       | 9.29E-07                             |
| SRX3592681.hESC_HUES8 | 10             | ATI                 | 1.01E-09       | 1.26E-06                             |
| SRX6476492.HUVEC      | 10             | ATI                 | 1.01E-09       | 1.26E-06                             |
| SRX064480.hESC_H9     | 12             | Myofibroblast       | 1.03E-09       | 1.28E-06                             |
| SRX3592681.hESC_HUES8 | 15             | Ciliated            | 1.04E-09       | 1.30E-06                             |
| SRX2844312.hESC_H1    | 11             | Macrophage_Alveolar | 1.10E-09       | 1.38E-06                             |
| SRX6957437.HGrC1      | 5              | VE_Arterial         | 1.22E-09       | 1.53E-06                             |
| SRX3592677.hESC_HUES8 | 10             | VE_Capillary_B      | 1.80E-09       | 2.25E-06                             |
| SRX6957437.HGrC1      | 10             | Macrophage          | 3.23E-09       | 4.03E-06                             |
| SRX2844312.hESC_H1    | 8              | Club                | 3.40E-09       | 4.25E-06                             |
| SRX3592677.hESC_HUES8 | 6              | T                   | 4.96E-09       | 6.19E-06                             |
| SRX6957437.HGrC1      | 6              | T                   | 4.96E-09       | 6.19E-06                             |
| SRX6476492.HUVEC      | 6              | T                   | 4.96E-09       | 6.19E-06                             |
| SRX2844312.hESC_H1    | 6              | T_Cytotoxic         | 4.96E-09       | 6.19E-06                             |
| SRX3592681.hESC_HUES8 | 6              | T_Cytotoxic         | 4.96E-09       | 6.19E-06                             |
| SRX6476492.HUVEC      | 6              | T_Cytotoxic         | 4.96E-09       | 6.19E-06                             |
| SRX6957437.HGrC1      | 10             | Macrophage_Alveolar | 7.30E-09       | 9.12E-06                             |
| SRX3592681.hESC_HUES8 | 6              | NK                  | 8.08E-09       | 1.01E-05                             |
| SRX6476492.HUVEC      | 6              | NK                  | 8.08E-09       | 1.01E-05                             |
| SRX3592681.hESC_HUES8 | 6              | Lymphatic           | 1.19E-08       | 1.49E-05                             |
| SRX064480.hESC_H9     | 13             | Ciliated            | 1.67E-08       | 2.09E-05                             |
| SRX2844312.hESC_H1    | 5              | VE_Venous           | 1.73E-08       | 2.16E-05                             |
| SRX064481.hESC_H9     | 5              | VE_Venous           | 1.73E-08       | 2.16E-05                             |
| SRX3592677.hESC_HUES8 | 6              | cMonocyte           | 3.19E-08       | 3.98E-05                             |
| SRX3592681.hESC_HUES8 | 6              | cMonocyte           | 3.19E-08       | 3.98E-05                             |
| SRX6476492.HUVEC      | 7              | Club                | 3.97E-08       | 4.95E-05                             |
| SRX064481.hESC_H9     | 4              | VE_Capillary_A      | 4.73E-08       | 5.91E-05                             |
| SRX6476489.HUVEC      | 3              | Goblet              | 6.31E-08       | 7.87E-05                             |
| SRX3592677.hESC_HUES8 | 12             | Ciliated            | 6.70E-08       | 8.36E-05                             |
| SRX064480.hESC_H9     | 8              | Fibroblast          | 8.93E-08       | 0.0001142                            |
| SRX6957437.HGrC1      | 5              | T_Cytotoxic         | 1.24E-07       | 0.00015428                           |
| SRX6476489.HUVEC      | 3              | cDC1                | 1.24E-07       | 0.00015467                           |
| SRX2844312.hESC_H1    | 5              | NK                  | 1.85E-07       | 0.0002313                            |
| SRX3592677.hESC_HUES8 | 5              | NK                  | 1.85E-07       | 0.0002313                            |
| SRX3592681.hESC_HUES8 | 6              | cDC2                | 1.98E-07       | 0.00024703                           |
| SRX6476492.HUVEC      | 6              | cDC2                | 1.98E-07       | 0.00024703                           |
| SRX2844312.hESC_H1    | 5              | neMonocyte          | 2.18E-07       | 0.00027252                           |
| SRX064480.hESC_H9     | 5              | neMonocyte          | 2.18E-07       | 0.00027252                           |
| SRX6476492.HUVEC      | 5              | Lymphatic           | 2.56E-07       | 0.00031942                           |
| SRX064480.hESC_H9     | 9              | ATII                | 2.92E-07       | 0.00036388                           |
| SRX064480.hESC_H9     | 8              | Macrophage_Alveolar | 3.17E-07       | 0.00039512                           |
| SRX3592681.hESC_HUES8 | 8              | Macrophage_Alveolar | 3.17E-07       | 0.00039512                           |

| <b>Annotation</b>                          | <b># genes</b> | <b>Celltype</b>     | <b>P value</b> | <b>Adjusted P value (Bonferroni)</b> |
|--------------------------------------------|----------------|---------------------|----------------|--------------------------------------|
| SRX2844312.hESC_H1                         | 5              | cMonocyte           | 5.78E-07       | 0.00072187                           |
| SRX064480.hESC_H9                          | 5              | cMonocyte           | 5.78E-07       | 0.00072187                           |
| SRX3592685.hESC_HUES8                      | 4              | VE_Venous           | 6.38E-07       | 0.00079662                           |
| SRX064490.hESC_derived_mesendodermal_cells | 7              | VE_Capillary_B      | 7.84E-07       | 0.0009782                            |
| SRX6476489.HUVEC                           | 3              | T_Regulatory        | 1.16E-06       | 0.0014436                            |
| SRX2844311.hESC_H1                         | 7              | Macrophage          | 1.18E-06       | 0.00146799                           |
| SRX2844311.hESC_H1                         | 7              | Macrophage_Alveolar | 2.08E-06       | 0.00259036                           |
| SRX3592677.hESC_HUES8                      | 7              | Macrophage_Alveolar | 2.08E-06       | 0.00259036                           |
| SRX2844312.hESC_H1                         | 5              | cDC2                | 2.63E-06       | 0.0032855                            |
| SRX064480.hESC_H9                          | 5              | cDC2                | 2.63E-06       | 0.0032855                            |
| SRX6957437.HGrC1                           | 5              | cDC2                | 2.63E-06       | 0.0032855                            |
| SRX064480.hESC_H9                          | 4              | T_Cytotoxic         | 3.05E-06       | 0.00380179                           |
| SRX3592677.hESC_HUES8                      | 4              | T_Cytotoxic         | 3.05E-06       | 0.00380179                           |
| SRX6957437.HGrC1                           | 3              | VE_Capillary_A      | 3.38E-06       | 0.00421364                           |
| SRX2844311.hESC_H1                         | 6              | ATI                 | 4.18E-06       | 0.00521319                           |
| SRX6957437.HGrC1                           | 4              | NK                  | 4.20E-06       | 0.00524638                           |
| SRX3592677.hESC_HUES8                      | 4              | neMonocyte          | 4.79E-06       | 0.00597751                           |
| SRX6957491.HGrC1                           | 3              | VE_Arterial         | 4.92E-06       | 0.00613532                           |
| SRX3592677.hESC_HUES8                      | 5              | Club                | 5.30E-06       | 0.00661806                           |
| SRX3592681.hESC_HUES8                      | 5              | Club                | 5.30E-06       | 0.00661806                           |
| SRX6957437.HGrC1                           | 5              | Club                | 5.30E-06       | 0.00661806                           |
| SRX6957437.HGrC1                           | 4              | Lymphatic           | 5.43E-06       | 0.00678252                           |
| SRX2844311.hESC_H1                         | 6              | VE_Capillary_B      | 5.90E-06       | 0.00736051                           |
| SRX2844311.hESC_H1                         | 7              | Myofibroblast       | 5.95E-06       | 0.00742512                           |
| SRX064490.hESC_derived_mesendodermal_cells | 6              | Macrophage          | 8.35E-06       | 0.01041697                           |
| SRX6957437.HGrC1                           | 2              | Goblet              | 1.80E-05       | 0.02247524                           |
| SRX064481.hESC_H9                          | 3              | B                   | 1.86E-05       | 0.02325141                           |
| SRX3592677.hESC_HUES8                      | 3              | VE_Venous           | 2.32E-05       | 0.02892459                           |
| SRX064490.hESC_derived_mesendodermal_cells | 6              | Myofibroblast       | 3.34E-05       | 0.04170616                           |

**S Table 10: Study information of GWAS summary statistics**

| Trait                        | Abbrev   | Sample size | Reference                                                                                                                                                                     |
|------------------------------|----------|-------------|-------------------------------------------------------------------------------------------------------------------------------------------------------------------------------|
| Alcoholism                   | DrnkWk   | 537349      | <a href="https://www.nature.com/articles/s41588-018-0307-5">https://www.nature.com/articles/s41588-018-0307-5</a>                                                             |
| Alzheimer's Disease          | AD       | 63926       | <a href="https://www.niagads.org/igap-rv-summary-stats-kunkle-p-value-data">https://www.niagads.org/igap-rv-summary-stats-kunkle-p-value-data</a>                             |
| Anorexia Nervosa             | AN       | 72517       | <a href="https://www.nature.com/articles/s41588-019-0439-2">https://www.nature.com/articles/s41588-019-0439-2</a>                                                             |
| Anxiety Disorder             | ADs      | 31890       | <a href="https://jamanetwork.com/journals/jamapsychiatry/fullarticle/2733149">https://jamanetwork.com/journals/jamapsychiatry/fullarticle/2733149</a>                         |
| Asthma                       | asthma   | 127669      | <a href="https://www.nature.com/articles/s41588-017-0014-7">https://www.nature.com/articles/s41588-017-0014-7</a>                                                             |
| Bipolar Disorder             | BD       | 51710       | <a href="https://www.nature.com/articles/s41588-019-0397-8">https://www.nature.com/articles/s41588-019-0397-8</a>                                                             |
| Body Mass Index              | BMI      | 795640      | <a href="https://academic.oup.com/hmg/article/27/20/3641/5067845">https://academic.oup.com/hmg/article/27/20/3641/5067845</a>                                                 |
| Breast Cancer                | BC       | 228951      | <a href="https://www.nature.com/articles/nature24284">https://www.nature.com/articles/nature24284</a>                                                                         |
| Chronic Kidney Disease       | CKD      | 118147      | <a href="https://www.nature.com/articles/ncomms10023">https://www.nature.com/articles/ncomms10023</a>                                                                         |
| Crohn's Disease              | Crohn    | 40266       | <a href="https://www.nature.com/articles/ng.3760">https://www.nature.com/articles/ng.3760</a>                                                                                 |
| Epilepsy                     | epilepsy | 34853       | <a href="https://www.sciencedirect.com/science/article/pii/S1474442214701711?via%3Dihub">https://www.sciencedirect.com/science/article/pii/S1474442214701711?via%3Dihub</a>   |
| HDL Cholesterol              | HDL      | 99900       | <a href="https://www.nature.com/articles/nature09270">https://www.nature.com/articles/nature09270</a>                                                                         |
| Height                       | Height   | 709706      | <a href="https://academic.oup.com/hmg/article/27/20/3641/5067845">https://academic.oup.com/hmg/article/27/20/3641/5067845</a>                                                 |
| Inflammatory Bowel Disease   | IBD      | 59957       | <a href="https://www.nature.com/articles/ng.3760">https://www.nature.com/articles/ng.3760</a>                                                                                 |
| Insomnia                     | Insomnia | 113006      | <a href="https://www.nature.com/articles/ng.3888">https://www.nature.com/articles/ng.3888</a>                                                                                 |
| Ischaemic Stroke             | IS       | 29633       | <a href="https://n.neurology.org/content/86/13/1217.long">https://n.neurology.org/content/86/13/1217.long</a>                                                                 |
| LDL Cholesterol              | LDL      | 95454       | <a href="https://www.nature.com/articles/nature09270">https://www.nature.com/articles/nature09270</a>                                                                         |
| Lung Cancer                  | LC       | 85716       | <a href="https://pubmed.ncbi.nlm.nih.gov/28604730/">https://pubmed.ncbi.nlm.nih.gov/28604730/</a>                                                                             |
| Major Depressive Disorder    | MDD      | 500199      | <a href="http://dx.doi.org/10.1038/s41593-018-0326-7">http://dx.doi.org/10.1038/s41593-018-0326-7</a>                                                                         |
| Neuroticism                  | NSM      | 170911      | <a href="https://www.nature.com/articles/ng.3552">https://www.nature.com/articles/ng.3552</a>                                                                                 |
| Parkinson's Disease          | PD       | 482730      | <a href="https://www.biorxiv.org/content/10.1101/388165v3">https://www.biorxiv.org/content/10.1101/388165v3</a>                                                               |
| Primary Biliary Cirrhosis    | PBC      | 13239       | <a href="https://www.nature.com/articles/ncomms9019">https://www.nature.com/articles/ncomms9019</a>                                                                           |
| Resting Heart Rate           | RHR      | 134251      | <a href="http://dx.doi.org/10.1038/ng.3708">http://dx.doi.org/10.1038/ng.3708</a>                                                                                             |
| Rheumatoid Arthritis         | RA       | 58284       | <a href="https://www.nature.com/articles/nature12873">https://www.nature.com/articles/nature12873</a>                                                                         |
| Schizophrenia                | SCZ      | 105318      | <a href="https://www.nature.com/articles/s41588-018-0059-2">https://www.nature.com/articles/s41588-018-0059-2</a>                                                             |
| Sleep Duration               | SD       | 127573      | <a href="https://journals.plos.org/plosgenetics/article?id=10.1371/journal.pgen.1006125">https://journals.plos.org/plosgenetics/article?id=10.1371/journal.pgen.1006125</a>   |
| Systemic Lupus Erythematosus | SLE      | 14267       | <a href="http://dx.doi.org/10.1038/ng.3434">http://dx.doi.org/10.1038/ng.3434</a>                                                                                             |
| Total Cholesterol            | TC       | 100184      | <a href="https://www.nature.com/articles/nature09270">https://www.nature.com/articles/nature09270</a>                                                                         |
| Triglycerides                | TG       | 96598       | <a href="https://www.nature.com/articles/nature09270">https://www.nature.com/articles/nature09270</a>                                                                         |
| Type-II Diabetes             | T2D      | 159208      | <a href="http://diabetes.diabetesjournals.org/cgi/pmidlookup?view=long&amp;pmid=28566273">http://diabetes.diabetesjournals.org/cgi/pmidlookup?view=long&amp;pmid=28566273</a> |
| Ulcerative Colitis           | UC       | 45975       | <a href="https://www.nature.com/articles/ng.3760">https://www.nature.com/articles/ng.3760</a>                                                                                 |
| Monocyte count               | Monocyte | 131305      | <a href="https://www.sciencedirect.com/science/article/pii/S0092867416314635?via%3Dihub">https://www.sciencedirect.com/science/article/pii/S0092867416314635?via%3Dihub</a>   |
